# Supplementary material
Source: PubMed Central journal article supplement (PMC2785494)
Supplement: NIHMS147127-supplement-Supp_Tables.pdf [file NIHMS147127-supplement-Supp_Tables.pdf]

| Spot Number | Treatment | Raw file / Mascot DAT File Names | Protein name                            | Protein accession numbers | Protein molecular weight (Da) | Protein identification probability | Number of unique peptides | Number of unique spectra | Number of total spectra | Percentage of total spectra | Percentage sequence coverage | Peptide sequence     | Previous amino acid | Next amino acid | Best Peptide Identification probability | Best Mascot Ion score | Best Mascot Identity score | Best Mascot Tandem (logE) | Number of identified +1H | Number of identified +2H spectra | Number of identified +3H spectra | Number of identified +4H spectra | Number of enzymatic termini | Calculated Peptide Mass (AMU) | Peptide Index | Peptide stop index |
|-------------|-----------|----------------------------------|-----------------------------------------|---------------------------|-------------------------------|------------------------------------|---------------------------|--------------------------|-------------------------|-----------------------------|------------------------------|----------------------|---------------------|-----------------|-----------------------------------------|-----------------------|----------------------------|---------------------------|--------------------------|----------------------------------|----------------------------------|----------------------------------|-----------------------------|-------------------------------|---------------|--------------------|
| 1           | TI        | PN_Gase_S_1,RAW (F02471)         | Catalase, hydroperoxidase HPI(1) precur | O6682_YERP                | 81350.9                       | 98.70%                             | 1                         | 1                        | 1                       | 0.03%                       | 1.09%                        | TDSEFLPK             | K                   | S               | 95.00%                                  | 0                     | 0                          | 3.5                       | 0                        | 0                                | 0                                | 0                                | 2                           | 970.49                        | 29            | 36                 |
| 1           | TI        | PN_Gase_S_1,RAW (F02471)         | Envelope glycoprotein (Fragment)        | ORFLFM9_GHIV              | 97730.8                       | 98.40%                             | 1                         | 1                        | 1                       | 0.03%                       | 1.74%                        | LISGNTSTLTOACP       | K                   | A               | 95.00%                                  | 43.9                  | 50.6                       | 3.8                       | 0                        | 1                                | 0                                | 0                                | 2                           | 1693.83                       | 105           | 209                |
| 2           | TI        | PN_Gase_S_2,RAW (F02482)         | Envelope glycoprotein (Fragment)        | O11506_GHIV1              | 43969.8                       | 99.60%                             | 2                         | 2                        | 2                       | 0.07%                       | 3.79%                        | VVTFIEPLGVPATK       | K                   | A               | 95.00%                                  | 44.2                  | 47.2                       | 4.54                      | 0                        | 1                                | 0                                | 0                                | 2                           | 1323.79                       | 361           | 373                |
| 2           | TI        | PN_Gase_S_2,RAW (F02482)         | Envelope glycoprotein (Fragment)        | O11506_GHIV1              | 43969.8                       | 98.70%                             | 2                         | 2                        | 2                       | 0.07%                       | 3.79%                        | VVTFIEPLGVPATK       | K                   | A               | 95.00%                                  | 44.2                  | 50.1                       | 5                         | 0                        | 1                                | 0                                | 0                                | 2                           | 1323.79                       | 361           | 373                |
| 2           | TI        | PN_Gase_S_2,RAW (F02482)         | Envelope glycoprotein (Fragment)        | O11506_GHIV1              | 43969.8                       | 99.60%                             | 2                         | 2                        | 2                       | 0.07%                       | 3.79%                        | VVTFIEPLGVPATK       | K                   | A               | 95.00%                                  | 34.3                  | 44.4                       | 4.26                      | 0                        | 1                                | 0                                | 0                                | 2                           | 1614.95                       | 359           | 373                |
| 2           | TI        | PN_Gase_S_2,RAW (F02482)         | Envelope glycoprotein (Fragment)        | O11506_GHIV1              | 43969.8                       | 98.70%                             | 2                         | 2                        | 2                       | 0.07%                       | 3.79%                        | VVTFIEPLGVPATK       | K                   | A               | 95.00%                                  | 34.3                  | 50.3                       | 3.96                      | 0                        | 1                                | 0                                | 0                                | 2                           | 1614.95                       | 359           | 373                |
| 2           | TI        | PN_Gase_S_2,RAW (F02482)         | Polymerase                              | OR8344_9PAR               | 252728.1                      | 99.50%                             | 2                         | 3                        | 3                       | 0.10%                       | 1.07%                        | LGTLWLR              | R                   | G               | 95.00%                                  | 18.1                  | 45.3                       | 3.1                       | 0                        | 2                                | 0                                | 0                                | 2                           | 842.49                        | 1318          | 1324               |
| 2           | TI        | PN_Gase_S_2,RAW (F02482)         | Q77981_9HIV1                            | Q77981_9HIV1              | 60168.8                       | 97.30%                             | 1                         | 1                        | 1                       | 0.03%                       | 2.79%                        | LISGNTSTLTOACP       | R                   | V               | 95.00%                                  | 89.4                  | 47.2                       | 9.14                      | 0                        | 1                                | 0                                | 0                                | 2                           | 1692.83                       | 218           | 232                |
| 3           | TI        | PN_Gase_S_3,RAW (F02495)         | Alkaline nucleosidase                   | Q817C3_9GAM               | 55998.9                       | 99.40%                             | 1                         | 1                        | 1                       | 0.03%                       | 2.27%                        | DVGSVLLK             | R                   | V               | 93.80%                                  | 48.5                  | 47.8                       | -0.301                    | 0                        | 1                                | 0                                | 0                                | 2                           | 1146.67                       | 134           | 144                |
| 3           | TI        | PN_Gase_S_3,RAW (F02495)         | Envelope glycoprotein                   | O90295_9HIV1              | 97601.4                       | 100.00%                            | 7                         | 8                        | 9                       | 0.29%                       | 9.52%                        | AMYPAPIEGIR          | K                   | C               | 95.00%                                  | 77                    | 50.5                       | 7.42                      | 0                        | 1                                | 0                                | 0                                | 2                           | 1361.69                       | 433           | 444                |
| 3           | TI        | PN_Gase_S_3,RAW (F02495)         | Envelope glycoprotein                   | O90295_9HIV1              | 97601.4                       | 100.00%                            | 7                         | 8                        | 9                       | 0.29%                       | 9.52%                        | LISGNTSTLTOACP       | R                   | I               | 95.00%                                  | 113                   | 50.6                       | 6.88                      | 0                        | 1                                | 0                                | 0                                | 2                           | 1691.85                       | 198           | 212                |
| 3           | TI        | PN_Gase_S_3,RAW (F02495)         | Envelope glycoprotein                   | O90295_9HIV1              | 97601.4                       | 100.00%                            | 7                         | 8                        | 9                       | 0.29%                       | 9.52%                        | VVTFIEPLGVPATK       | K                   | A               | 95.00%                                  | 35.4                  | 48.3                       | 5.17                      | 0                        | 1                                | 0                                | 0                                | 2                           | 1323.79                       | 490           | 502                |
| 3           | TI        | PN_Gase_S_3,RAW (F02495)         | Envelope glycoprotein                   | O90295_9HIV1              | 97601.4                       | 100.00%                            | 7                         | 8                        | 9                       | 0.29%                       | 9.52%                        | VVTFIEPLGVPATK       | K                   | A               | 95.00%                                  | 37                    | 50.1                       | 2.41                      | 0                        | 2                                | 0                                | 0                                | 2                           | 1614.95                       | 498           | 502                |
| 4           | TI        | PN_Gase_S_4,RAW (F02501)         | Envelope glycoprotein                   | O90295_9HIV1              | 97601.4                       | 100.00%                            | 7                         | 11                       | 11                      | 0.33%                       | 9.99%                        | AMYPAPIEGIR          | K                   | C               | 95.00%                                  | 65.5                  | 50.5                       | 4.29                      | 0                        | 1                                | 0                                | 0                                | 2                           | 1345.69                       | 433           | 444                |
| 4           | TI        | PN_Gase_S_4,RAW (F02501)         | Envelope glycoprotein                   | O90295_9HIV1              | 97601.4                       | 100.00%                            | 7                         | 11                       | 11                      | 0.33%                       | 9.99%                        | VVTFIEPLGVPATK       | K                   | A               | 95.00%                                  | 84.1                  | 51.3                       | 6.77                      | 0                        | 1                                | 0                                | 0                                | 2                           | 1676.84                       | 122           | 135                |
| 4           | TI        | PN_Gase_S_4,RAW (F02501)         | Envelope glycoprotein                   | O90295_9HIV1              | 97601.4                       | 100.00%                            | 7                         | 11                       | 11                      | 0.33%                       | 9.99%                        | VVTFIEPLGVPATK       | K                   | A               | 95.00%                                  | 0                     | 0                          | 5.96                      | 0                        | 1                                | 0                                | 0                                | 2                           | 2235.26                       | 490           | 499                |
| 4           | TI        | PN_Gase_S_4,RAW (F02501)         | Envelope glycoprotein                   | O90295_9HIV1              | 97601.4                       | 100.00%                            | 7                         | 11                       | 11                      | 0.33%                       | 9.99%                        | VVTFIEPLGVPATK       | K                   | A               | 95.00%                                  | 0                     | 0                          | 5.96                      | 0                        | 1                                | 0                                | 0                                | 2                           | 2235.26                       | 483           | 502                |
| 4           | TI        | PN_Gase_S_4,RAW (F02501)         | Envelope glycoprotein                   | O90295_9HIV1              | 97601.4                       | 100.00%                            | 7                         | 11                       | 11                      | 0.33%                       | 9.99%                        | VVTFIEPLGVPATK       | K                   | A               | 95.00%                                  | 71.5                  | 50.1                       | 1.33                      | 0                        | 1                                | 1                                | 0                                | 2                           | 1323.79                       | 487           | 499                |
| 4           | TI        | PN_Gase_S_4,RAW (F02501)         | Envelope glycoprotein                   | O90295_9HIV1              | 97601.4                       | 100.00%                            | 7                         | 11                       | 11                      | 0.33%                       | 9.99%                        | VVTFIEPLGVPATK       | K                   | A               | 95.00%                                  | 71.5                  | 50.1                       | 1.33                      | 0                        | 1                                | 1                                | 0                                | 2                           | 1323.79                       | 490           | 502                |
| 4           | TI        | PN_Gase_S_4,RAW (F02501)         | Envelope glycoprotein                   | O90295_9HIV1              | 97601.4                       | 100.00%                            | 7                         | 11                       | 11                      | 0.33%                       | 9.99%                        | VVTFIEPLGVPATK       | K                   | A               | 95.00%                                  | 0                     | 0                          | 3.11                      | 0                        | 2                                | 0                                | 0                                | 2                           | 1614.95                       | 495           | 499                |
| 4           | TI        | PN_Gase_S_4,RAW (F02501)         | Envelope glycoprotein                   | O90295_9HIV1              | 97601.4                       | 100.00%                            | 7                         | 11                       | 11                      | 0.33%                       | 9.99%                        | VVTFIEPLGVPATK       | K                   | A               | 95.00%                                  | 0                     | 0                          | 3.11                      | 0                        | 2                                | 0                                | 0                                | 2                           | 1614.95                       | 488           | 502                |
| 5           | TI        | PN_Gase_S_5,RAW (F02505)         | Catalase, hydroperoxidase HPI(1) precur | O6682_YERP                | 81350.9                       | 97.00%                             | 1                         | 1                        | 1                       | 0.03%                       | 1.90%                        | YDGGRGADGGQOR        | R                   | F               | 92.00%                                  | 0                     | 0                          | 2.6                       | 0                        | 1                                | 0                                | 0                                | 2                           | 1449.68                       | 110           | 123                |
| 5           | TI        | PN_Gase_S_5,RAW (F02505)         | Envelope glycoprotein (Fragment)        | O41567_9HIV1              | 97453.3                       | 98.30%                             | 2                         | 2                        | 2                       | 0.07%                       | 3.14%                        | AMYPAPIEGIR          | R                   | C               | 95.00%                                  | 48                    | 50.5                       | 1.96                      | 0                        | 1                                | 0                                | 0                                | 2                           | 1361.69                       | 434           | 445                |
| 5           | TI        | PN_Gase_S_5,RAW (F02505)         | Envelope glycoprotein (Fragment)        | O90296_9HIV1              | 97048.4                       | 99.60%                             | 2                         | 4                        | 4                       | 0.13%                       | 5.02%                        | DGGEDTDTNTEIFRRGGGGR | K                   | V               | 92.00%                                  | 72                    | 51.5                       | 0.268                     | 0                        | 1                                | 0                                | 0                                | 2                           | 2193.03                       | 75            | 82                 |
| 5           | TI        | PN_Gase_S_5,RAW (F02505)         | Envelope glycoprotein (Fragment)        | O90296_9HIV1              | 97453.3                       | 98.90%                             | 2                         | 2                        | 2                       | 0.07%                       | 3.14%                        | LISGNTSTLTOACP       | R                   | V               | 80.60%                                  | 0                     | 0                          | 1.92                      | 0                        | 1                                | 0                                | 0                                | 2                           | 1693.83                       | 199           | 213                |
| 5           | TI        | PN_Gase_S_5,RAW (F02505)         | Envelope glycoprotein (Fragment)        | O90296_9HIV1              | 97048.4                       | 100.00%                            | 3                         | 4                        | 4                       | 0.13%                       | 5.02%                        | QINMWWK              | K                   | V               | 95.00%                                  | 39.6                  | 48.7                       | 2.54                      | 0                        | 1                                | 0                                | 0                                | 2                           | 1076.56                       | 422           | 429                |
| 5           | TI        | PN_Gase_S_5,RAW (F02505)         | Envelope glycoprotein (Fragment)        | O90296_9HIV1              | 97048.4                       | 100.00%                            | 3                         | 4                        | 4                       | 0.13%                       | 5.02%                        | VVTFIEPLGVPATK       | K                   | V               | 95.00%                                  | 73.7                  | 50                         | 7.26                      | 0                        | 1                                | 1                                | 0                                | 2                           | 1323.79                       | 490           | 502                |
| 10          | TI        | PN_Gase_S_10,RAW (F06223)        | Envelope glycoprotein                   | O90296_9HIV1              | 97856.6                       | 98.10%                             | 2                         | 2                        | 2                       | 0.04%                       | 98.9%                        | FFVALISGK            | R                   | A               | 90.80%                                  | 37                    | 49.2                       | 0.208                     | 0                        | 1                                | 0                                | 0                                | 2                           | 1508.26                       | 192           | 202                |
| 10          | TI        | PN_Gase_S_10,RAW (F06223)        | Envelope glycoprotein                   | O90296_9HIV1              | 97856.6                       | 98.10%                             | 2                         | 2                        | 2                       | 0.04%                       | 98.9%                        | VVTFIEPLGVPATK       | R                   | V               | 95.00%                                  | 89.2                  | 51                         | 10.4                      | 0                        | 1                                | 0                                | 0                                | 2                           | 1692.83                       | 218           | 232                |
| 10          | TI        | PN_Gase_S_10,RAW (F06223)        | Envelope glycoprotein (Fragment)        | Q71247_9HIV1              | 25578.2                       | 96.00%                             | 1                         | 1                        | 1                       | 0.02%                       | 2.79%                        | PVNLQGLQGMVHOAISPR   | R                   | V               | 92.80%                                  | 46.1                  | 51                         | -0.255                    | 0                        | 1                                | 0                                | 0                                | 2                           | 2032.08                       | 1             | 18                 |
| 10          | TI        | PN_Gase_S_10,RAW (F06223)        | Hsp70 protein (Fragment)                | Q6G211_9GAM               | 63826.5                       | 99.30%                             | 2                         | 3                        | 3                       | 0.05%                       | 12.8%                        | YKQKLVK              | K                   | I               | 95.00%                                  | 58.1                  | 48                         | 0                         | 0                        | 1                                | 0                                | 0                                | 2                           | 744.45                        | 450           | 455                |
| 10          | TI        | PN_Gase_S_10,RAW (F06223)        | Pol polyprotein (Fragment)              | Q36977_9RET               | 138983.1                      | 98.70%                             | 1                         | 1                        | 1                       | 0.02%                       | 0.80%                        | AVSQRGVLR            | K                   | E               | 95.00%                                  | 38.9                  | 49.1                       | 4.13                      | 0                        | 1                                | 0                                | 0                                | 2                           | 1088.6                        | 770           | 779                |
| 10          | TI        | PN_Gase_S_10,RAW (F06223)        | Protein                                 | Q68515_BVDV               | 446070.5                      | 98.80%                             | 1                         | 2                        | 3                       | 0.06%                       | 0.40%                        | TITLEVPSDITNVK       | R                   | A               | 95.00%                                  | 55.3                  | 51.9                       | 1.96                      | 0                        | 1                                | 0                                | 0                                | 2                           | 1787.93                       | 1602          | 1617               |
| 11          | TI        | PN_Gase_S_11,RAW (F06269)        | Actin (Fragment)                        | Q6S5L7_9MOL               | 22796.9                       | 99.50%                             | 2                         | 3                        | 3                       | 0.27%                       | 10.10%                       | ELTALAPSTMK          | K                   | I               | 95.00%                                  | 0                     | 0                          | 4.16                      | 0                        | 1                                | 0                                | 0                                | 2                           | 1177.61                       | 192           | 202                |
| 11          | TI        | PN_Gase_S_11,RAW (F06269)        | Actin (Fragment)                        | Q6S5L7_9MOL               | 22796.9                       | 99.50%                             | 2                         | 3                        | 3                       | 0.27%                       | 10.10%                       | ELTALAPSTMK          | K                   | I               | 95.00%                                  | 0                     | 0                          | 4.16                      | 0                        | 1                                | 0                                | 0                                | 2                           | 1177.61                       | 192           | 202                |
| 11          | TI        | PN_Gase_S_11,RAW (F06269)        | Gag protein                             | OS2528_9HIV1              | 55642.5                       | 98.40%                             | 1                         | 3                        | 3                       | 0.27%                       | 2.20%                        | MYPSPSSIDIR          | R                   | Q               | 95.00%                                  | 38.9                  | 50.5                       | 1.59                      | 0                        | 3                                | 0                                | 0                                | 2                           | 1281.65                       | 276           | 286                |
| 12          | TI        | PN_Gase_S_12,RAW (F06209)        | Envelope glycoprotein                   | O90296_9HIV1              | 97048.4                       | 98.30%                             | 2                         | 2                        | 3                       | 0.11%                       | 5.02%                        | LISGNTSTLTOACP       | R                   | V               | 95.00%                                  | 96.7                  | 51                         | 6.5                       | 0                        | 2                                | 0                                | 0                                | 2                           | 1692.83                       | 218           | 232                |
| 13          | TI        | PN_Gase_S_13,RAW (F02599)        | Gag polyprotein (Fragment)              | Q5W3W5_9HIV               | 24868.3                       | 97.20%                             | 1                         | 1                        | 1                       | 0.02%                       | 8.07%                        | LHMLKQDITNEEAAEWRD   | K                   | T               | 83.20%                                  | 63                    | 51.3                       | 0.553                     | 0                        | 1                                | 0                                | 0                                | 2                           | 2193.03                       | 60            | 77                 |
| 13          | TI        | PN_Gase_S_13,RAW (F02599)        | Gag polyprotein (Fragment)              | Q92084_9HIV1              | 181758.7                      | 99.00%                             | 1                         | 4                        | 4                       | 0.04%                       | 16.70%                       | LHPVHAGPAPGQMR       | K                   | E               | 95.00%                                  | 30.8                  | 50.1                       | 4.29                      | 0                        | 1                                | 0                                | 0                                | 2                           | 1507.96                       | 215           | 229                |
| 13          | TI        | PN_Gase_S_13,RAW (F02599)        | Gp160 protein                           | QB8L60_9HIV1              | 97007.2                       | 98.90%                             | 1                         | 1                        | 1                       | 0.02%                       | 1.75%                        | GDPRPEWEEGEGGR       | R                   | D               | 86.40%                                  | 40.5                  | 50                         | 2.75                      | 0                        | 1                                | 0                                | 0                                | 2                           | 1626.74                       | 725           | 739                |
| 13          | TI        | PN_Gase_S_13,RAW (F02599)        | Protein                                 | Q5EG67_9POT               | 347514.5                      | 98.50%                             | 2                         | 2                        | 2                       | 0.04%                       | 0.82%                        | LYKGLSGLWNSLK        | R                   | A               | 82.20%                                  | 0                     | 0                          | 2.01                      | 0                        | 1                                | 0                                | 0                                | 2                           | 1535.86                       | 2434          | 2447               |
| 14          | TI        | PN_Gase_S_14,RAW (F02600)        | Gag-polyprotein (Fragment)              | Q90292_9HIV1              | 270933.7                      | 99.00%                             | 1                         | 1                        | 1                       | 0.02%                       | 8.67%                        | LHPVHAGPAPGQMR       | R                   | V               | 95.00%                                  | 69.7                  | 49.8                       | 3.96                      | 0                        | 1                                | 0                                | 0                                | 2                           | 1508.26                       | 192           | 202                |
| 14          | TI        | PN_Gase_S_14,RAW (F02600)        | Polymerase                              | OR8344_9PAR               | 252728.1                      | 100.00%                            | 2                         | 3                        | 4                       | 0.08%                       | 0.85%                        | LGTLWLR              | R                   | G               | 82.50%                                  | 0                     | 0                          | 1.96                      | 1                        | 1                                | 0                                | 0                                | 2                           | 842.49                        | 1318          | 1324               |
| 15          | TI        | PN_Gase_S_15,RAW (F02602)        | Gag polyprotein (Fragment)              | Q5W3W5_9HIV               | 24868.3                       | 99.50%                             | 1                         | 1                        | 1                       | 0.02%                       | 11.70%                       | LHMLKQDITNEEAAEWRD   | K                   | T               | 95.00%                                  | 54.1                  | 51.7                       | 0.824                     | 0                        | 2                                | 0                                | 0                                | 2                           | 2193.03                       | 60            | 77                 |
| 15          | TI        | PN_Gase_S_15,RAW (F02602)        | Gag protein (Fragment)                  | Q673V1_9HIV1              | 56774.8                       | 97.60%                             | 1                         | 2                        | 2                       | 0.04%                       | 6.25%                        | ALGPAPALEEMTACGGVVK  | K                   | A               | 95.00%                                  | 71.2                  | 50.6                       | 1.64                      | 0                        | 2                                | 0                                | 0                                | 2                           | 2413.13                       | 341           | 364                |
| 15          | TI        | PN_Gase_S_15,RAW (F02602)        | Gag protein (Fragment)                  | Q699A6_9HIV1              | 15732.3                       | 99.00%                             |                           |                          |                         |                             |                              |                      |                     |                 |                                         |                       |                            |                           |                          |                                  |                                  |                                  |                             |                               |               |                    |

|    |                             |                                                   |              |          |         |   |   |       |                         |                             |   |        |        |      |       |      |   |   |   |   |         |         |      |     |
|----|-----------------------------|---------------------------------------------------|--------------|----------|---------|---|---|-------|-------------------------|-----------------------------|---|--------|--------|------|-------|------|---|---|---|---|---------|---------|------|-----|
| 23 | H9 PNase S_23_RAW (F029511) | Envelope glycoprotein (Fragment).                 | O11586_SHIV1 | 44992.5  | 99.30%  | 2 | 2 | 2     | 0.04%                   | 6.20% CSSDTGLLTR            | R | D      | 95.00% | 52.5 | 50    | 4.92 | 0 | 1 | 0 | 0 | 2       | 1335.69 | 326  | 337 |
| 23 | H9 PNase S_23_RAW (F029511) | Envelope glycoprotein (Fragment).                 | O90296_SHIV1 | 97048.4  | 100.00% | 3 | 4 | 4     | 0.08%                   | 6.07% DGGEDTDNDTEIFRRGGGCR  | R | D      | 95.00% | 69.9 | 51.5  | 3.19 | 0 | 1 | 0 | 0 | 2       | 2370.98 | 457  | 478 |
| 23 | H9 PNase S_23_RAW (F029511) | Hydrophobic protein.                              | O81915_3CAU  | 29448.8  | 91.00%  | 1 | 1 | 1     | 0.00%                   | 3.16% LKDAHLAK              | L | D      | 95.00% | 31.8 | 48.1  | 3.57 | 0 | 0 | 0 | 0 | 1       | 870.33  | 115  | 122 |
| 23 | H9 PNase S_23_RAW (F029511) | Large T antigen.                                  | O8JUDO_POJV  | 79254.1  | 98.00%  | 1 | 1 | 1     | 0.02%                   | 1.31% CIVNLNPKL             | K | R      | 95.00% | 0    | 0     | 6.96 | 0 | 1 | 0 | 0 | 2       | 1084.66 | 412  | 420 |
| 23 | H9 PNase S_23_RAW (F029511) | ORF1.                                             | O6XZL4_RUBV  | 230674.8 | 97.00%  | 1 | 1 | 1     | 0.02%                   | 0.61% DPPPLPPSPAPP          | R | R      | 86.80% | 0    | 0     | 2.06 | 0 | 1 | 0 | 0 | 2       | 1337.72 | 753  | 765 |
| 24 | H9 PNase S_24_RAW (F029514) | Envelope glycoprotein (Fragment).                 | O67002_SHIV1 | 95578.9  | 98.00%  | 1 | 1 | 1     | 0.02%                   | 3.33% EATTLFCASDAK          | K | S      | 95.00% | 88.4 | 50.5  | 4.96 | 0 | 1 | 0 | 0 | 2       | 1414.65 | 54   | 66  |
| 24 | H9 PNase S_24_RAW (F029514) | Envelope glycoprotein (Fragment).                 | O77981_SHIV1 | 60168.8  | 97.70%  | 1 | 2 | 2     | 0.04%                   | 5.21% EATTLFCASDAK          | K | A      | 95.00% | 88.4 | 50.5  | 4.96 | 0 | 1 | 0 | 0 | 2       | 1414.65 | 54   | 66  |
| 24 | H9 PNase S_24_RAW (F029514) | Envelope glycoprotein (Fragment).                 | O77981_SHIV1 | 60168.8  | 97.70%  | 1 | 2 | 2     | 0.04%                   | 5.21% LISCDSVTIQAQCPK       | R | V      | 95.00% | 96.1 | 50.6  | 7.11 | 0 | 1 | 1 | 0 | 2       | 1692.83 | 218  | 232 |
| 24 | H9 PNase S_24_RAW (F029514) | Envelope glycoprotein (Fragment).                 | O97002_SHIV1 | 95578.9  | 98.90%  | 1 | 1 | 1     | 0.02%                   | 3.32% YKVEIEERLGVAPTK       | K | A      | 95.00% | 46.6 | 50.1  | 2.96 | 0 | 1 | 0 | 0 | 2       | 1642.94 | 474  | 488 |
| 24 | H9 PNase S_24_RAW (F029514) | Envelope glycoprotein (Fragment).                 | O90296_SHIV1 | 97048.4  | 100.00% | 4 | 5 | 5     | 0.09%                   | 5.81% DGGEDTDNDTEIFRRGGGCR  | R | D      | 95.00% | 61.3 | 52.1  | 3.13 | 0 | 1 | 0 | 0 | 2       | 2258.03 | 457  | 478 |
| 24 | H9 PNase S_24_RAW (F029514) | Envelope glycoprotein.                            | O90295_SHIV1 | 97601.4  | 100.00% | 4 | 5 | 5     | 0.09%                   | 5.81% EATTLFCASDAK          | K | A      | 95.00% | 88.4 | 50.5  | 4.96 | 0 | 1 | 0 | 0 | 2       | 1414.65 | 46   | 58  |
| 24 | H9 PNase S_24_RAW (F029514) | Envelope glycoprotein.                            | O56567_SHIV1 | 96742.4  | 97.60%  | 1 | 1 | 1     | 0.02%                   | 3.87% EATTLFCASDAK          | K | A      | 95.00% | 88.4 | 50.5  | 4.96 | 0 | 1 | 0 | 0 | 2       | 1414.65 | 46   | 58  |
| 24 | H9 PNase S_24_RAW (F029514) | Envelope glycoprotein.                            | O90295_SHIV1 | 97601.4  | 100.00% | 4 | 5 | 5     | 0.09%                   | 5.81% VVTIEPLGVAPTK         | K | A      | 95.00% | 17.6 | 50.1  | 3.57 | 0 | 1 | 0 | 0 | 2       | 1323.79 | 490  | 502 |
| 24 | H9 PNase S_24_RAW (F029514) | Envelope glycoprotein.                            | O90295_SHIV1 | 97601.4  | 100.00% | 4 | 5 | 5     | 0.09%                   | 5.81% YKVEIEERLGVAPTK       | K | A      | 95.00% | 46.6 | 50.1  | 3.43 | 0 | 1 | 0 | 0 | 2       | 1614.95 | 498  | 502 |
| 24 | H9 PNase S_24_RAW (F029514) | Envelope glycoprotein.                            | O90295_SHIV1 | 97601.4  | 100.00% | 4 | 5 | 5     | 0.09%                   | 5.81% EATTLFCASDAK          | K | A      | 95.00% | 88.4 | 50.5  | 4.96 | 0 | 1 | 0 | 0 | 2       | 1414.65 | 46   | 58  |
| 24 | H9 PNase S_24_RAW (F029514) | Envelope glycoprotein.                            | O90295_SHIV1 | 97601.4  | 100.00% | 4 | 5 | 5     | 0.09%                   | 5.81% LTPGLVLDCTDLR         | K | N      | 95.00% | 55.2 | 51.3  | 4.96 | 0 | 1 | 0 | 0 | 2       | 1676.84 | 121  | 134 |
| 24 | H9 PNase S_24_RAW (F029514) | Envelope glycoprotein.                            | O90295_SHIV1 | 97601.4  | 100.00% | 2 | 2 | 2     | 0.06%                   | 8.77% VAEPSPPR              | R | D      | 95.00% | 0    | 0     | 2.52 | 0 | 1 | 0 | 0 | 2       | 842.44  | 117  | 124 |
| 25 | H9 PNase S_25_RAW (F029515) | Envelope glycoprotein (Fragment).                 | O90296_SHIV1 | 97048.4  | 100.00% | 5 | 6 | 7     | 0.13%                   | 6.42% DGGEDTDNDTEIFRRGGGCR  | R | D      | 95.00% | 67.2 | 51.4  | 5.21 | 0 | 1 | 0 | 0 | 2       | 2370.98 | 457  | 478 |
| 25 | H9 PNase S_25_RAW (F029515) | Envelope glycoprotein (Fragment).                 | O90296_SHIV1 | 97048.4  | 100.00% | 5 | 6 | 7     | 0.13%                   | 6.42% EATTLFCASDAK          | K | A      | 95.00% | 0    | 0     | 3.44 | 0 | 1 | 0 | 0 | 2       | 1414.65 | 46   | 58  |
| 25 | H9 PNase S_25_RAW (F029515) | Envelope glycoprotein (Fragment).                 | O90296_SHIV1 | 97048.4  | 100.00% | 5 | 6 | 7     | 0.13%                   | 6.42% SELKYKVVITIEPLGVAPTK  | R | A      | 86.80% | 0    | 0     | 2.07 | 0 | 1 | 0 | 0 | 2       | 2235.26 | 483  | 502 |
| 25 | H9 PNase S_25_RAW (F029515) | Envelope glycoprotein (Fragment).                 | O41627_SHIV1 | 46172.1  | 97.60%  | 1 | 1 | 1     | 0.02%                   | 1.70% TIVMLK                | K | E      | 94.00% | 36.2 | 46.8  | 1.92 | 0 | 1 | 0 | 0 | 2       | 823.54  | 174  | 160 |
| 25 | H9 PNase S_25_RAW (F029515) | Envelope glycoprotein (Fragment).                 | O90296_SHIV1 | 97048.4  | 100.00% | 5 | 6 | 7     | 0.13%                   | 6.42% VVTIEPLGVAPTK         | K | A      | 95.00% | 63.2 | 50.1  | 6.62 | 0 | 1 | 0 | 0 | 2       | 1323.79 | 490  | 502 |
| 25 | H9 PNase S_25_RAW (F029515) | Envelope glycoprotein (Fragment).                 | O90296_SHIV1 | 97048.4  | 100.00% | 5 | 6 | 7     | 0.13%                   | 6.42% YKVVITIEPLGVAPTK      | K | A      | 95.00% | 42.7 | 50.3  | 4.01 | 0 | 2 | 0 | 0 | 2       | 1614.95 | 488  | 502 |
| 25 | H9 PNase S_25_RAW (F029515) | Envelope glycoprotein.                            | O9W016_SHIV  | 37544.5  | 99.30%  | 2 | 2 | 2     | 0.04%                   | 7.38% LISCDSVTIQAQCPK       | R | V      | 95.00% | 65.6 | 50.6  | 2.28 | 0 | 1 | 0 | 0 | 2       | 1692.83 | 65   | 79  |
| 25 | H9 PNase S_25_RAW (F029515) | Envelope glycoprotein.                            | O9W016_SHIV  | 37544.5  | 99.30%  | 2 | 2 | 2     | 0.04%                   | 7.38% NQTEVFRLLGK           | R | -      | 86.80% | 0    | 0     | 2.07 | 0 | 1 | 0 | 0 | 2       | 1040.54 | 330  | 339 |
| 25 | H9 PNase S_25_RAW (F029515) | Gag protein (Fragment).                           | O699A6_SHIV1 | 15732.3  | 97.70%  | 1 | 1 | 1     | 0.02%                   | 7.97% MYSPTSLDR             | R | Q      | 95.00% | 64.6 | 49.4  | 5    | 0 | 1 | 0 | 0 | 2       | 1297.65 | 7    | 17  |
| 25 | H9 PNase S_25_RAW (F029515) | Hypothetical protein OSJNBa0090O10.               | O8GXZ7_ORY2  | 20446.7  | 96.70%  | 1 | 1 | 1     | 0.02%                   | 4.04% DAGSGVTR              | A | R      | 90.20% | 0    | 0     | 2.29 | 0 | 1 | 0 | 0 | 1       | 718.35  | 49   | 56  |
| 26 | H9 PNase S_26_RAW (F029446) | Envelope glycoprotein.                            | O9W016_SHIV  | 37544.5  | 98.10%  | 1 | 1 | 1     | 0.02%                   | 4.43% LISCDSVTIQAQCPK       | R | V      | 95.00% | 40.4 | 50.2  | 3.8  | 0 | 1 | 0 | 0 | 2       | 1692.83 | 65   | 79  |
| 26 | H9 PNase S_26_RAW (F029446) | Envelope glycoprotein.                            | O6TAP1_SHIV1 | 97201.9  | 100.00% | 3 | 3 | 3     | 0.06%                   | 3.16% VFRFGGDMR             | K | R      | 82.80% | 0    | 0     | 1.92 | 0 | 1 | 0 | 0 | 2       | 1323.79 | 487  | 499 |
| 26 | H9 PNase S_26_RAW (F029446) | Envelope glycoprotein.                            | O6TAP1_SHIV1 | 97201.9  | 100.00% | 3 | 3 | 3     | 0.06%                   | 3.16% YKVVITIEPLGVAPTK      | K | A      | 95.00% | 60.5 | 50.1  | 5    | 0 | 1 | 0 | 0 | 2       | 1323.79 | 487  | 499 |
| 26 | H9 PNase S_26_RAW (F029446) | Envelope glycoprotein.                            | O6TAP1_SHIV1 | 97201.9  | 100.00% | 3 | 3 | 3     | 0.06%                   | 3.16% YKVVITIEPLGVAPTK      | K | A      | 95.00% | 46.9 | 50.1  | 2.88 | 0 | 1 | 0 | 0 | 2       | 1614.95 | 485  | 499 |
| 26 | H9 PNase S_26_RAW (F029446) | Polyprotein (Fragment).                           | O98534_SPAK  | 257278.1 | 98.00%  | 1 | 1 | 1     | 0.02%                   | 5.14% LKDAHLAK              | L | D      | 95.00% | 25   | 48    | 2.5  | 0 | 1 | 0 | 0 | 2       | 842.44  | 117  | 124 |
| 26 | H9 PNase S_26_RAW (F029446) | Envelope glycoprotein (Fragment).                 | O6Y1M5_SHIV  | 89592.2  | 97.30%  | 1 | 1 | 1     | 0.02%                   | 1.38% CSSDTGLLTR            | R | D      | 93.00% | 70.8 | 45.7  | 2.89 | 0 | 1 | 0 | 0 | 2       | 1335.69 | 363  | 474 |
| 26 | H9 PNase S_26_RAW (F029446) | Putative tape-measure protein.                    | O9T1AT_BP411 | 186244.7 | 95.70%  | 1 | 1 | 1     | 0.02%                   | 0.84% SGAKTAGGVISALK        | K | G      | 81.80% | 0    | 0     | 2.13 | 0 | 1 | 0 | 0 | 2       | 1387.79 | 285  | 299 |
| 29 | H9 PNase S_29_RAW (F024697) | Hypothetical protein OSJNBa0090O10.               | O8GXZ7_ORY2  | 20446.7  | 98.50%  | 1 | 1 | 1     | 0.02%                   | 8.08% SCATGSRASASGTRRR      | R | R      | 84.50% | 0    | 0     | 2.3  | 0 | 1 | 0 | 0 | 2       | 1623.81 | 99   | 114 |
| 31 | H9 PNase S_31_RAW (F024700) | Adp (Fragment).                                   | O98534_SPAK  | 22796.9  | 98.00%  | 2 | 2 | 2     | 0.06%                   | 1.89% GYSFTTAEK             | R | E      | 95.00% | 35.4 | 50.6  | 5.98 | 0 | 1 | 0 | 0 | 2       | 1153.23 | 263  | 268 |
| 32 | H9 PNase S_32_RAW (F024700) | Gag protein (Fragment).                           | O9I0T5_SHIV1 | 25520.3  | 99.10%  | 1 | 1 | 1     | 0.02%                   | 10.40% ALGPAATLEEMTACGGVIGK | A | A      | 95.00% | 42.9 | 43    | 1.04 | 0 | 1 | 0 | 0 | 2       | 2429.13 | 204  | 227 |
| 32 | H9 PNase S_32_RAW (F024700) | Gag-pol fusion polyprotein.                       | O92894_SHIV1 | 161758.7 | 97.90%  | 1 | 1 | 1     | 0.02%                   | 1.67% ALGPAATLEEMTACGGVIGK  | A | A      | 95.00% | 54.3 | 43.7  | 1.92 | 0 | 1 | 0 | 0 | 2       | 2415.11 | 336  | 359 |
| 32 | H9 PNase S_32_RAW (F024700) | Pestivirus type 1 cytopathic genomic RO11993_BVDV | O58885.1     | 98.50%   | 1       | 1 | 1 | 0.02% | 0.18% ESTLHLVLR         | K                           | L | 87.70% | 35.6   | 44.9 | 1.35  | 0    | 1 | 0 | 0 | 2 | 1067.62 | 2662    | 2670 |     |
| 32 | H9 PNase S_32_RAW (F024700) | Pestivirus type 1 cytopathic genomic RO11993_BVDV | O58885.1     | 98.50%   | 1       | 1 | 1 | 0.02% | 0.18% TSLSDYNIKSTLHLVLR | R                           | L | 95.00% | 33.7   | 45.4 | 3.29  | 0    | 1 | 0 | 0 | 2 | 1076.59 | 119     | 127  |     |
| 33 | H9 PNase S_33_RAW (F006215) | Gene 12 protein.                                  | O718G3_BPSF  | 46497.6  | 98.10%  | 1 | 1 | 1     | 0.02%                   | 2.55% NSIGTLAAGAR           | R | L      | 95.00% | 0    | 0     | 2.29 | 0 | 1 | 0 | 0 | 2       | 1030.57 | 119  | 129 |
| 33 | H9 PNase S_33_RAW (F006215) | Helicase.                                         | O8S9NS_3CAU  | 14282.2  | 98.80%  | 1 | 1 | 1     | 0.02%                   | 10.40% IDMLIVSLTKK          | K | N      | 94.60% | 41.1 | 50.3  | 1.2  | 0 | 1 | 0 | 0 | 2       | 1472.91 | 21   | 33  |
| 33 | H9 PNase S_33_RAW (F006215) | RNA polymerase.                                   | O33334_3CAU  | 217255.7 | 97.00%  | 1 | 1 | 1     | 0.02%                   | 4.48% LKDAHLAK              | L | N      | 95.00% | 34.1 | 50    | 1.28 | 0 | 1 | 0 | 0 | 2       | 1029.55 | 302  | 318 |
| 33 | H9 PNase S_33_RAW (F006215) | Pestivirus type 1 cytopathic genomic RO11993_BVDV | O58885.1     | 100.00%  | 2       | 4 | 5 | 0.11% | 1.20% AKIQDKGIPPPDOOR   | K                           | L | 83.80% | 0      | 0    | 1.77  | 0    | 1 | 0 | 0 | 2 | 1722.91 | 2622    | 2636 |     |
| 33 | H9 PNase S_33_RAW (F006215) | Pestivirus type 1 cytopathic genomic RO11993_BVDV | O58885.1     | 100.00%  | 2       | 4 | 5 | 0.11% | 1.20% ESTLHLVLR         | K                           | L | 95.00% | 67.4   | 48.9 | -2.63 | 0    | 6 | 0 | 0 | 2 | 1067.62 | 2662    | 2670 |     |
| 33 | H9 PNase S_33_RAW (F006215) | Pestivirus type 1 cytopathic genomic RO11993_BVDV | O58885.1     | 100.00%  | 2       | 4 | 5 | 0.11% | 1.20% IQDKEGIPPPDOOR    | K                           | L | 95.00% | 49     | 51.1 | 1.48  | 0    | 8 | 7 | 0 | 2 | 1523.78 | 2624    | 2636 |     |
| 33 | H9 PNase S_33_RAW (F006215) | Pestivirus type 1 cytopathic genomic RO11993_BVDV | O58885.1     | 100.00%  | 2       | 4 | 5 | 0.11% | 1.20% TSLSDYNIKSTLHLVLR | R                           | L | 95.00% | 45.1   | 48.5 | 0     | 0    | 4 | 0 | 0 | 2 | 1081.55 | 356     | 323  |     |
| 33 | H9 PNase S_33_RAW (F006215) | Pestivirus type 1 cytopathic genomic RO11993_BVDV | O58885.1     | 100.00%  | 2       | 4 | 5 | 0.11% | 1.20% TSLSDYNIKSTLHLVLR | R                           | L | 95.00% | 0      | 0    | 3.52  | 0    | 1 | 0 | 0 | 2 | 2130.16 | 2653    | 2670 |     |
| 33 | H9 PNase S_33_RAW (F006215) | Polyprotein (Fragment).                           | O91N44_BVDV  | 62402.2  | 97.70%  | 1 | 2 | 4     | 0.09%                   | 12.80% AKIQDKGIPPPDOOR      | K | L      | 83.80% | 0    | 0     | 1.77 | 0 | 1 | 0 | 0 | 2       | 1722.9  |      |     |

| Spot Number | Treatment | Raw file / Mascot DAT File Names | Protein name                                          | Protein accession numbers  | Protein molecular weight (Da) | Protein identification probability | Number of unique peptides | Number of spectra | Number of total spectra | Percentage of total spectra | Percentage sequence coverage | Peptide sequence | Previous amino acid | Next amino acid | Best Peptide identification probability | Best Mascot Ion score | Best Mascot Ion score | Best X! Tandem log(e) | Number of identified +H1 | Number of identified +H2 | Number of identified +H3 | Number of identified +H4 | Number of enzymatic tryptic | Calculate Peptide Mass | Peptide start index | Peptide stop index |
|-------------|-----------|----------------------------------|-------------------------------------------------------|----------------------------|-------------------------------|------------------------------------|---------------------------|-------------------|-------------------------|-----------------------------|------------------------------|------------------|---------------------|-----------------|-----------------------------------------|-----------------------|-----------------------|-----------------------|--------------------------|--------------------------|--------------------------|--------------------------|-----------------------------|------------------------|---------------------|--------------------|
| 1           | T1 PNGase | S_1.RAW (F025142)                | beta actin                                            | gi 30355057                | 41986.2                       | 99.90%                             | 3                         | 4                 | 4                       | 0.13%                       | 13.60% LDLAGRLDLYTLK         | R                | I                   | 95.00%          | 41.9                                    | 41.4                  | 2.24                  | 0                     | 0                        | 0                        | 0                        | 0                        | 2                           | 1630.84                | 179                 | 192                |
| 1           | T1 PNGase | S_1.RAW (F025142)                | beta actin                                            | gi 30355057                | 41986.2                       | 99.90%                             | 3                         | 4                 | 4                       | 0.13%                       | 13.60% VAPEHDPILLTEAPLNK     | R                | I                   | 88.50%          | 0                                       | 0                     | 2.1                   | 0                     | 0                        | 0                        | 0                        | 0                        | 2                           | 1954.07                | 97                  | 114                |
| 1           | T1 PNGase | S_1.RAW (F025142)                | chaperonin containing TCP1, subunit 8 (theta)         | gi 1136741.gi 31418053.gi  | 59633.1                       | 99.90%                             | 2                         | 2                 | 2                       | 0.07%                       | 3.83% EDGASITVLR             | K                | G                   | 90.20%          | 35.2                                    | 42.1                  | 1.28                  | 0                     | 1                        | 0                        | 0                        | 0                        | 2                           | 1173.65                | 368                 | 378                |
| 1           | T1 PNGase | S_1.RAW (F025142)                | chaperonin containing TCP1, subunit 8 (theta)         | gi 1136741.gi 31418053.gi  | 59633.1                       | 99.90%                             | 2                         | 2                 | 2                       | 0.07%                       | 3.83% FAEAFEAAPR             | K                | A                   | 95.00%          | 30.3                                    | 40.5                  | 5.02                  | 0                     | 1                        | 0                        | 0                        | 0                        | 2                           | 1150.59                | 441                 | 450                |
| 1           | T1 PNGase | S_1.RAW (F025142)                | stimulator of TAR RNA binding                         | gi 1200184.gi 7682790      | 57908                         | 99.90%                             | 2                         | 2                 | 2                       | 0.07%                       | 4.27% IGLSVSEVIEGEGR         | R                | C                   | 95.00%          | 40.0                                    | 0                     | 2.82                  | 0                     | 0                        | 1                        | 0                        | 0                        | 2                           | 1960.55                | 9                   | 21                 |
| 1           | T1 PNGase | S_1.RAW (F025142)                | stimulator of TAR RNA binding                         | gi 1200184.gi 7682790      | 57908                         | 99.90%                             | 2                         | 2                 | 2                       | 0.07%                       | 4.27% SHIDALCYR              | R                | C                   | 95.00%          | 37.5                                    | 42.1                  | 2.85                  | 0                     | 1                        | 0                        | 0                        | 0                        | 2                           | 1183.63                | 404                 | 413                |
| 2           | T1 PNGase | S_2.RAW (F025143)                | chaperonin containing TCP1, subunit 8 (theta)         | gi 1136741.gi 31418053.gi  | 58485                         | 100.00%                            | 3                         | 3                 | 3                       | 0.10%                       | 6.68% AIADTGANVVTGGK         | R                | V                   | 95.00%          | 10.7                                    | 42                    | 7.6                   | 0                     | 1                        | 0                        | 0                        | 0                        | 2                           | 1372.74                | 282                 | 296                |
| 2           | T1 PNGase | S_2.RAW (F025143)                | chaperonin containing TCP1, subunit 8 (theta)         | gi 1136741.gi 31418053.gi  | 58485                         | 100.00%                            | 3                         | 3                 | 3                       | 0.10%                       | 6.68% DIDEVSSLLR             | R                | T                   | 95.00%          | 50.6                                    | 42.4                  | 4                     | 0                     | 1                        | 0                        | 0                        | 0                        | 2                           | 1146.6                 | 156                 | 165                |
| 2           | T1 PNGase | S_2.RAW (F025143)                | chaperonin containing TCP1, subunit 8 (theta)         | gi 1136741.gi 31418053.gi  | 58485                         | 100.00%                            | 3                         | 3                 | 3                       | 0.10%                       | 6.68% DIDEVSSLLR             | R                | T                   | 95.00%          | 66                                      | 41.8                  | 2.02                  | 0                     | 1                        | 0                        | 0                        | 0                        | 2                           | 1173.65                | 368                 | 378                |
| 3           | T1 PNGase | S_3.RAW (F025145)                | chaperonin containing TCP1, subunit 5 (epsilon)       | gi 12804225.gi 24307939.gi | 59654.3                       | 100.00%                            | 5                         | 5                 | 5                       | 0.15%                       | 12.60% AVTIFR                | R                | G                   | 95.00%          | 40.7                                    | 43.1                  | 9                     | 0                     | 1                        | 0                        | 0                        | 0                        | 2                           | 819.51                 | 382                 | 388                |
| 3           | T1 PNGase | S_3.RAW (F025145)                | chaperonin containing TCP1, subunit 5 (epsilon)       | gi 12804225.gi 24307939.gi | 59654.3                       | 100.00%                            | 5                         | 5                 | 5                       | 0.15%                       | 12.60% ENMFLGIDGLHK          | R                | G                   | 89.20%          | 40.3                                    | 41.4                  | -0.672                | 0                     | 1                        | 0                        | 0                        | 0                        | 2                           | 1513.71                | 484                 | 496                |
| 3           | T1 PNGase | S_3.RAW (F025145)                | chaperonin containing TCP1, subunit 5 (epsilon)       | gi 12804225.gi 24307939.gi | 59654.3                       | 100.00%                            | 5                         | 5                 | 5                       | 0.15%                       | 12.60% ISDVLVQDKDTPLQTK      | K                | T                   | 95.00%          | 54.9                                    | 39.4                  | 3.26                  | 0                     | 1                        | 0                        | 0                        | 0                        | 2                           | 2185.2                 | 151                 | 170                |
| 3           | T1 PNGase | S_3.RAW (F025145)                | chaperonin containing TCP1, subunit 5 (epsilon)       | gi 12804225.gi 24307939.gi | 59654.3                       | 100.00%                            | 5                         | 5                 | 5                       | 0.15%                       | 12.60% LDVTSVDYD             | K                | A                   | 95.00%          | 55                                      | 41.7                  | 2.09                  | 0                     | 1                        | 0                        | 0                        | 0                        | 2                           | 1168.57                | 286                 | 275                |
| 3           | T1 PNGase | S_3.RAW (F025145)                | chaperonin containing TCP1, subunit 5 (epsilon)       | gi 12804225.gi 24307939.gi | 59654.3                       | 100.00%                            | 5                         | 5                 | 5                       | 0.15%                       | 12.60% QMAEIAVAVLTVADMER     | R                | R                   | 95.00%          | 74                                      | 39                    | 3.8                   | 0                     | 1                        | 0                        | 0                        | 0                        | 2                           | 1992.97                | 184                 | 201                |
| 3           | T1 PNGase | S_3.RAW (F025145)                | chaperonin containing TCP1, subunit 8 (theta)         | gi 1136741.gi 40789055     | 58485                         | 100.00%                            | 4                         | 4                 | 4                       | 0.12%                       | 9.28% APFGAQMLK              | K                | E                   | 95.00%          | 43.9                                    | 42.8                  | 2.38                  | 0                     | 1                        | 0                        | 0                        | 0                        | 2                           | 978.51                 | 8                   | 16                 |
| 3           | T1 PNGase | S_3.RAW (F025145)                | chaperonin containing TCP1, subunit 8 (theta)         | gi 1136741.gi 40789055     | 58485                         | 100.00%                            | 4                         | 4                 | 4                       | 0.12%                       | 9.28% IGLSVSEVIEGEGYIACR     | R                | K                   | 95.00%          | 65                                      | 40.8                  | 4.52                  | 0                     | 1                        | 0                        | 0                        | 0                        | 2                           | 1894.96                | 121                 | 137                |
| 3           | T1 PNGase | S_3.RAW (F025145)                | copine I                                              | gi 23397704.gi 48145697.gi | 59088.6                       | 99.50%                             | 2                         | 2                 | 2                       | 0.06%                       | 5.03% GTTIVSAQELK            | R                | D                   | 95.00%          | 67.1                                    | 42.4                  | 4.2                   | 0                     | 1                        | 0                        | 0                        | 0                        | 2                           | 1146.64                | 125                 | 135                |
| 3           | T1 PNGase | S_3.RAW (F025145)                | copine I                                              | gi 23397704.gi 48145697.gi | 59088.6                       | 99.50%                             | 2                         | 2                 | 2                       | 0.06%                       | 5.03% LYGFNFAPINHVAR         | R                | F                   | 95.00%          | 42.3                                    | 40.2                  | 1.6                   | 0                     | 1                        | 0                        | 0                        | 0                        | 2                           | 1782.97                | 385                 | 400                |
| 3           | T1 PNGase | S_3.RAW (F025145)                | dihydropyrimidinase-like 2 variant                    | gi 45501286                | 62276                         | 100.00%                            | 3                         | 3                 | 3                       | 0.09%                       | 6.29% GLVDYGPVCEVYTFK        | R                | T                   | 95.00%          | 53.1                                    | 41.5                  | 6.32                  | 0                     | 1                        | 0                        | 0                        | 0                        | 2                           | 1620.8                 | 497                 | 511                |
| 3           | T1 PNGase | S_3.RAW (F025145)                | dihydropyrimidinase-like 2 variant                    | gi 45501286                | 62276                         | 100.00%                            | 3                         | 3                 | 3                       | 0.09%                       | 6.29% ILEVDGTHVTEGSSGR       | K                | Y                   | 95.00%          | 33.3                                    | 41.2                  | 2.96                  | 0                     | 1                        | 0                        | 0                        | 0                        | 2                           | 1682.87                | 452                 | 467                |
| 3           | T1 PNGase | S_3.RAW (F025145)                | ER-60 protease (Protein disulfide isomerase family A) | gi 1208427.gi 21361657.gi  | 56767.6                       | 99.50%                             | 2                         | 2                 | 2                       | 0.06%                       | 4.75% LAPEVEAATR             | R                | V                   | 95.00%          | 86                                      | 42.7                  | 2.64                  | 0                     | 1                        | 0                        | 0                        | 0                        | 2                           | 1191.6                 | 63                  | 73                 |
| 3           | T1 PNGase | S_3.RAW (F025145)                | ER-60 protease (Protein disulfide isomerase family A) | gi 1208427.gi 21361657.gi  | 56767.6                       | 99.50%                             | 2                         | 2                 | 2                       | 0.06%                       | 4.75% SEPFSNDQVPK            | K                | V                   | 95.00%          | 50.5                                    | 42.3                  | 3.25                  | 0                     | 1                        | 0                        | 0                        | 0                        | 2                           | 1368.17                | 367                 | 379                |
| 3           | T1 PNGase | S_3.RAW (F025145)                | Heterogeneous nuclear ribonucleoprotein K, isoform 1  | gi 15292044.gi 460789.gi   | 50960.5                       | 98.70%                             | 2                         | 2                 | 2                       | 0.06%                       | 3.89% ILLDLSGAPQMLK          | K                | G                   | 95.00%          | 65                                      | 40.8                  | 4.52                  | 0                     | 1                        | 0                        | 0                        | 0                        | 2                           | 1340.8                 | 106                 | 117                |
| 3           | T1 PNGase | S_3.RAW (F025145)                | Heterogeneous nuclear ribonucleoprotein K, isoform 2  | gi 15292044.gi 460789.gi   | 50960.5                       | 98.70%                             | 2                         | 2                 | 2                       | 0.06%                       | 3.89% VYKEDKLLDSESPK         | K                | G                   | 86.60%          | 38.6                                    | 40.7                  | -0.644                | 0                     | 1                        | 0                        | 0                        | 0                        | 2                           | 2012.17                | 207                 | 219                |
| 4           | T1 PNGase | S_4.RAW (F025146)                | chaperonin containing TCP1, subunit 5 (epsilon)       | gi 12804225.gi 24307939.gi | 60918.7                       | 100.00%                            | 3                         | 3                 | 3                       | 0.09%                       | 9.04% ISDVLVQDKDTPLQTK       | K                | T                   | 95.00%          | 49.1                                    | 38.9                  | 4.92                  | 0                     | 1                        | 0                        | 0                        | 0                        | 2                           | 2186.2                 | 163                 | 182                |
| 4           | T1 PNGase | S_4.RAW (F025146)                | chaperonin containing TCP1, subunit 5 (epsilon)       | gi 12804225.gi 24307939.gi | 60918.7                       | 100.00%                            | 3                         | 3                 | 3                       | 0.09%                       | 9.04% VYGGGAEISALASVDEAKR    | K                | N                   | 95.00%          | 38.7                                    | 40.5                  | 3.54                  | 0                     | 1                        | 0                        | 0                        | 0                        | 2                           | 2195.07                | 430                 | 451                |
| 4           | T1 PNGase | S_4.RAW (F025146)                | chaperonin containing TCP1, subunit 8 (theta)         | gi 1136741.gi 31418053.gi  | 58485                         | 100.00%                            | 6                         | 6                 | 6                       | 0.18%                       | 17.40% AIADTGANVVTGGK        | R                | V                   | 95.00%          | 110                                     | 41.5                  | 6.08                  | 0                     | 1                        | 0                        | 0                        | 0                        | 2                           | 1372.74                | 282                 | 296                |
| 4           | T1 PNGase | S_4.RAW (F025146)                | chaperonin containing TCP1, subunit 8 (theta)         | gi 1136741.gi 31418053.gi  | 58485                         | 100.00%                            | 6                         | 6                 | 6                       | 0.18%                       | 17.40% IGLSVSEVIEGEGYIACR    | R                | K                   | 95.00%          | 37.9                                    | 40.1                  | 3.77                  | 0                     | 1                        | 0                        | 0                        | 0                        | 2                           | 1894.96                | 121                 | 137                |
| 4           | T1 PNGase | S_4.RAW (F025146)                | copine I                                              | gi 23397704.gi 48145697.gi | 58485                         | 100.00%                            | 4                         | 4                 | 4                       | 0.12%                       | 8.82% DTVQFVYR               | R                | R                   | 81.90%          | 74.6                                    | 39                    | 1.27                  | 0                     | 1                        | 0                        | 0                        | 0                        | 2                           | 1933.23                | 182                 | 203                |
| 4           | T1 PNGase | S_4.RAW (F025146)                | copine I                                              | gi 23397704.gi 48145697.gi | 58485                         | 100.00%                            | 4                         | 4                 | 4                       | 0.12%                       | 8.82% DTVQFVYR               | R                | R                   | 81.90%          | 62.5                                    | 40.7                  | 1.07                  | 0                     | 1                        | 0                        | 0                        | 0                        | 2                           | 1136.61                | 478                 | 486                |
| 4           | T1 PNGase | S_4.RAW (F025146)                | copine I                                              | gi 23397704.gi 48145697.gi | 58485                         | 100.00%                            | 4                         | 4                 | 4                       | 0.12%                       | 8.82% GYDVIDMK               | R                | T                   | 95.00%          | 35.5                                    | 41.5                  | 2.62                  | 0                     | 1                        | 0                        | 0                        | 0                        | 2                           | 1084.53                | 76                  | 84                 |
| 4           | T1 PNGase | S_4.RAW (F025146)                | copine I                                              | gi 23397704.gi 48145697.gi | 58485                         | 100.00%                            | 4                         | 4                 | 4                       | 0.12%                       | 8.82% LYGFNFAPINHVAR         | R                | F                   | 95.00%          | 49.7                                    | 41.1                  | 1.92                  | 0                     | 1                        | 0                        | 0                        | 0                        | 2                           | 1782.97                | 385                 | 400                |
| 4           | T1 PNGase | S_4.RAW (F025146)                | ER-60 protease (Protein disulfide isomerase family A) | gi 1208427.gi 21361657.gi  | 56767.6                       | 100.00%                            | 4                         | 4                 | 4                       | 0.15%                       | 10.50% LQYEFYFETVYK          | R                | A                   | 83.90%          | 38                                      | 41.3                  | 0                     | 0                     | 1                        | 0                        | 0                        | 0                        | 2                           | 1654.88                | 81                  | 93                 |
| 4           | T1 PNGase | S_4.RAW (F025146)                | ER-60 protease (Protein disulfide isomerase family A) | gi 1208427.gi 21361657.gi  | 56767.6                       | 100.00%                            | 4                         | 4                 | 4                       | 0.15%                       | 10.50% FLDQYFDQNLK           | R                | Y                   | 95.00%          | 45.3                                    | 41.6                  | 0                     | 0                     | 1                        | 0                        | 0                        | 0                        | 2                           | 1515.76                | 352                 | 363                |
| 4           | T1 PNGase | S_4.RAW (F025146)                | ER-60 protease (Protein disulfide isomerase family A) | gi 1208427.gi 21361657.gi  | 56767.6                       | 100.00%                            | 4                         | 4                 | 4                       | 0.15%                       | 10.50% IFRDGEEAGVYDPR        | K                | T                   | 95.00%          | 51.5                                    | 41.6                  | 3.6                   | 0                     | 1                        | 0                        | 0                        | 0                        | 2                           | 1652.77                | 105                 | 119                |
| 4           | T1 PNGase | S_4.RAW (F025146)                | ER-60 protease (Protein disulfide isomerase family A) | gi 1208427.gi 21361657.gi  | 56767.6                       | 100.00%                            | 4                         | 4                 | 4                       | 0.15%                       | 10.50% LQYEFYFETVYK          | K                | A                   | 95.00%          | 64.5                                    | 41.1                  | 3.37                  | 0                     | 1                        | 0                        | 0                        | 0                        | 2                           | 1937.72                | 461                 | 476                |
| 4           | T1 PNGase | S_4.RAW (F025146)                | ER-60 protease (Protein disulfide isomerase family A) | gi 1208427.gi 21361657.gi  | 56767.6                       | 100.00%                            | 4                         | 4                 | 4                       | 0.15%                       | 10.50% MDATANDVPSPPYR        | K                | G                   | 95.00%          | 0                                       | 0                     | 8.64                  | 0                     | 2                        | 0                        | 0                        | 0                        | 2                           | 1664.76                | 434                 | 448                |
| 4           | T1 PNGase | S_4.RAW (F025146)                | T complex protein 1                                   | gi 36796.gi 5786325.gi 57  | 4389                          | 100.00%                            | 3                         | 3                 | 3                       | 0.09%                       | 10.50% ICDDLELLK             | R                | N                   | 95.00%          | 59                                      | 42.3                  | 1.7                   | 0                     | 1                        | 0                        | 0                        | 0                        | 2                           | 1233.66                | 201                 | 210                |
| 4           | T1 PNGase | S_4.RAW (F025146)                | T complex protein 1                                   | gi 36796.gi 5786325.gi 57  | 4389                          | 100.00%                            | 3                         | 3                 | 3                       | 0.09%                       | 10.50% ILATGANVLTGGIDMCLK    | K                | Y                   | 95.00%          | 44.7                                    | 40.7                  | 3.48                  | 0                     | 1                        | 0                        | 0                        | 0                        | 2                           | 2192.13                | 123                 | 143                |
| 4           | T1 PNGase | S_4.RAW (F025146)                | T complex protein 1                                   | gi 36796.gi 5786325.gi 57  | 4389                          | 100.00%                            | 3                         | 3                 | 3                       | 0.09%                       | 10.50% ILATGANVLTGGIDMCLK    | K                | Y                   | 95.00%          | 61.7                                    | 40.3                  | 5.29                  | 0                     | 1                        | 0                        | 0                        | 0                        | 2                           | 1231.65                | 106                 | 156                |
| 5           | T1 PNGase | S_5.RAW (F025147)                | beta actin                                            | gi 14250401                | 40987.9                       | 99.90%                             | 3                         | 3                 | 3                       | 0.10%                       | 10.90% LVDNDSGMCK            | -                | A                   | 86.20%          | 0                                       | 0                     | 1.89                  | 0                     | 0                        | 1                        | 0                        | 0                        | 2                           | 1195.55                | 1                   | 11                 |
| 5           | T1 PNGase | S_5.RAW (F025147)                | beta actin                                            | gi 14250401                | 40987.9                       | 99.90%                             | 3                         | 3                 | 3                       | 0.10%                       | 10.90% QEYDESGPSIVHR         | K                | K                   | 95.00%          | 45.8                                    | 41.9                  | 0.886                 | 0                     | 1                        | 0                        | 0                        | 0                        | 2                           | 1516.7                 | 353                 | 365                |
| 5           | T1 PNGase | S_5.RAW (F025147)                | beta actin                                            | gi 14250401                | 40987.9                       | 99.90%                             | 3                         | 3                 | 3                       | 0.10%                       | 10.90% SYELPQDQVITGNER       | K                | F                   | 90.70%          | 22.5                                    | 41.2                  | 2.66                  | 0                     | 1                        |                          |                          |                          |                             |                        |                     |                    |



|    |    |    |      |                    |                                                      |                            |           |         |    |    |    |       |        |                        |   |   |        |      |      |       |      |   |   |   |   |   |         |         |       |       |
|----|----|----|------|--------------------|------------------------------------------------------|----------------------------|-----------|---------|----|----|----|-------|--------|------------------------|---|---|--------|------|------|-------|------|---|---|---|---|---|---------|---------|-------|-------|
| 18 | T1 | PN | Gase | S.18.RAW (F025164) | Vmenin                                               | gi 16552261.gi 21043084.g  | 53562.6   | 100.00% | 3  | 3  | 3  | 0.06% | 8.58%  | FADLSEANRRNDLALR       | K | Q | 87.30% | 0    | 0    | 1.92  | 0    | 0 | 1 | 0 | 0 | 2 | 1776.86 | 295     | 310   |       |
| 19 | T1 | PN | Gase | S.19.RAW (F025165) | actin prepeptide                                     | gi 178027.gi 178067.gi 383 | 41908.2   | 100.00% | 4  | 4  | 5  | 0.10% | 14.40% | AVFVPSIVGR             | R | P | 92.40% | 41   | 0    | 2     | 0    | 2 | 0 | 0 | 0 | 0 | 2       | 945.55  | 30    | 38    |
| 19 | T1 | PN | Gase | S.19.RAW (F025165) | actin prepeptide                                     | gi 178027.gi 178067.gi 383 | 41908.2   | 100.00% | 4  | 4  | 5  | 0.10% | 14.40% | ETALAPSTMK             | K | I | 95.00% | 41   | 42   | 0.444 | 0    | 0 | 1 | 0 | 0 | 2 | 1171.61 | 96      | 113   |       |
| 19 | T1 | PN | Gase | S.19.RAW (F025165) | actin prepeptide                                     | gi 178027.gi 178067.gi 383 | 41908.2   | 100.00% | 4  | 4  | 5  | 0.10% | 14.40% | VAPEHFLLTLEAPLNK       | R | A | 95.00% | 43.8 | 40.6 | 0.7   | 0    | 0 | 1 | 0 | 0 | 2 | 1956.05 | 97      | 114   |       |
| 19 | T1 | PN | Gase | S.19.RAW (F025165) | Calpain, small subunit 1                             | gi 40674605                | 28212.6   | 100.00% | 10 | 12 | 13 | 0.25% | 18.70% | GGGGGGGGGGGGGGGGGGGTTG | I | I | 87.30% | 0    | 0    | 1.1   | 0    | 0 | 1 | 0 | 0 | 1 | 1771.85 | 38      | 60    |       |
| 19 | T1 | PN | Gase | S.19.RAW (F025165) | Calpain, small subunit 1                             | gi 40674605                | 28212.6   | 100.00% | 10 | 12 | 13 | 0.25% | 18.70% | GGGGGGGGGGGGGGGGGGGTTG | I | I | 92.70% | 0    | 0    | 1.4   | 0    | 0 | 1 | 0 | 0 | 2 | 1742.26 | 39      | 60    |       |
| 19 | T1 | PN | Gase | S.19.RAW (F025165) | Calpain, small subunit 1                             | gi 40674605                | 28212.6   | 100.00% | 10 | 12 | 13 | 0.25% | 18.70% | GGGGGGGGGGGGGGGGGGTAMG | I | I | 85.00% | 0    | 0    | 2.08  | 0    | 0 | 1 | 0 | 0 | 1 | 1657.81 | 40      | 60    |       |
| 19 | T1 | PN | Gase | S.19.RAW (F025165) | Calpain, small subunit 1                             | gi 40674605                | 28212.6   | 100.00% | 10 | 12 | 13 | 0.25% | 18.70% | GGGGGGGGGGGGGGGGGGTAMR | I | I | 86.50% | 0    | 0    | 1.07  | 0    | 0 | 1 | 0 | 0 | 1 | 1470.56 | 41      | 60    |       |
| 19 | T1 | PN | Gase | S.19.RAW (F025165) | Calpain, small subunit 1                             | gi 40674605                | 28212.6   | 100.00% | 10 | 12 | 13 | 0.25% | 18.70% | GGGGGGGGGGGGGGGGGGTAMR | G | I | 95.00% | 0    | 0    | 2.09  | 0    | 0 | 2 | 0 | 0 | 1 | 1333.57 | 42      | 60    |       |
| 19 | T1 | PN | Gase | S.19.RAW (F025165) | Calpain, small subunit 1                             | gi 40674605                | 28212.6   | 100.00% | 10 | 12 | 13 | 0.25% | 18.70% | GGGGGGGGGGGGGGGGGGTAMR | G | I | 89.70% | 0    | 0    | 1.11  | 0    | 0 | 1 | 0 | 0 | 1 | 1276.55 | 43      | 60    |       |
| 19 | T1 | PN | Gase | S.19.RAW (F025165) | Calpain, small subunit 1                             | gi 40674605                | 28212.6   | 100.00% | 10 | 12 | 13 | 0.25% | 18.70% | GGGGGGGGGGGGGGGGGGTAMR | G | I | 95.00% | 0    | 0    | 1.98  | 0    | 0 | 1 | 0 | 0 | 1 | 1162.5  | 45      | 60    |       |
| 19 | T1 | PN | Gase | S.19.RAW (F025165) | Calpain, small subunit 1                             | gi 40674605                | 28212.6   | 100.00% | 10 | 12 | 13 | 0.25% | 18.70% | GGGGGGGGGGGGGGGGGGTAMR | G | I | 87.20% | 0    | 0    | 1.09  | 0    | 0 | 1 | 0 | 0 | 1 | 1596.81 | 10      | 32    |       |
| 19 | T1 | PN | Gase | S.19.RAW (F025165) | Calpain, small subunit 1                             | gi 40674605                | 28212.6   | 100.00% | 10 | 12 | 13 | 0.25% | 18.70% | GGGGGGGGGGGGGGGGGGTAMR | G | I | 90.40% | 0    | 0    | 1.24  | 0    | 0 | 1 | 0 | 0 | 1 | 1064.45 | 47      | 60    |       |
| 19 | T1 | PN | Gase | S.19.RAW (F025165) | c-Myc-responsive protein Rcl                         | gi 40354201.gi 5454002     | 16169.4   | 99.50%  | 2  | 2  | 2  | 0.04% | 21.60% | TEHVAALGKLR            | R | G | 95.00% | 77   | 39   | 6     | 3.26 | 0 | 0 | 1 | 0 | 0 | 2       | 1741.92 | 49    | 85    |
| 19 | T1 | PN | Gase | S.19.RAW (F025165) | c-Myc-responsive protein Rcl                         | gi 40354201.gi 5454002     | 16169.4   | 99.50%  | 2  | 2  | 2  | 0.04% | 21.60% | GEPRPALVFCOSR          | R | G | 89.80% | 32.5 | 39.9 | 0.824 | 0    | 0 | 1 | 0 | 0 | 1 | 2       | 1679.83 | 16    | 30    |
| 19 | T1 | PN | Gase | S.19.RAW (F025165) | eukaryotic initiation factor 5A                      | gi 89031353                | 25721.4   | 100.00% | 4  | 4  | 4  | 0.08% | 21.40% | KYEDPCPTHMMDVSNIK      | K | R | 95.00% | 75.4 | 40.7 | 3.92  | 0    | 0 | 1 | 0 | 0 | 2 | 2177    | 152     | 169   |       |
| 19 | T1 | PN | Gase | S.19.RAW (F025165) | eukaryotic initiation factor 5A                      | gi 89031353                | 25721.4   | 100.00% | 4  | 4  | 4  | 0.08% | 21.40% | LVKQIDFTTK             | K | K | 95.00% | 40.6 | 41.9 | 3.11  | 0    | 0 | 0 | 0 | 0 | 2 | 1298.75 | 140     | 151   |       |
| 19 | T1 | PN | Gase | S.19.RAW (F025165) | Plasminogen [Homo sapiens]                           | gi 38051823                | 90565.4   | 99.70%  | 2  | 2  | 2  | 0.04% | 2.59%  | LESPADITDK             | K | V | 95.00% | 39.8 | 42.7 | 0.959 | 0    | 0 | 1 | 0 | 0 | 0 | 2       | 1046.54 | 671   | 680   |
| 19 | T1 | PN | Gase | S.19.RAW (F025165) | Titin                                                | gi 17066105.gi 50659088    | 3815862.5 | 100.00% | 4  | 4  | 4  | 0.08% | 0.17%  | GDQAQVTCYASNIAGK       | K | D | 80.10% | 0    | 0    | 0.886 | 0    | 0 | 1 | 0 | 0 | 0 | 2       | 1618.72 | 8204  | 8219  |
| 19 | T1 | PN | Gase | S.19.RAW (F025165) | Titin                                                | gi 17066105.gi 50659088    | 3815862.5 | 100.00% | 4  | 4  | 4  | 0.08% | 0.17%  | VGLEATSVPGTKVPEDK      | K | L | 92.00% | 0    | 0    | 1.35  | 0    | 0 | 1 | 0 | 0 | 1 | 2       | 1783.94 | 24268 | 24945 |
| 20 | T1 | PN | Gase | S.20.RAW (F025166) | polyubiquitin C                                      | gi 13569612                | 16157.7   | 100.00% | 3  | 4  | 4  | 0.08% | 33.30% | IQZKGGGGPPDQR          | K | L | 95.00% | 62.9 | 41.6 | 3.02  | 0    | 0 | 1 | 0 | 0 | 2 | 1523.76 | 43      | 55    |       |
| 20 | T1 | PN | Gase | S.20.RAW (F025166) | polyubiquitin C                                      | gi 13569612                | 16157.7   | 100.00% | 3  | 4  | 4  | 0.08% | 33.30% | TITLEVPSDITNKK         | K | A | 95.00% | 69.4 | 41.6 | 6.72  | 0    | 0 | 1 | 0 | 0 | 0 | 2       | 1787.93 | 25    | 40    |
| 20 | T1 | PN | Gase | S.20.RAW (F025166) | polyubiquitin C                                      | gi 13569612                | 16157.7   | 100.00% | 3  | 4  | 4  | 0.08% | 33.30% | TLSDYNIKKESTLHLVLR     | R | L | 95.00% | 61.1 | 40.6 | 2.6   | 0    | 0 | 1 | 0 | 0 | 0 | 2       | 2130.16 | 68    | 85    |
| 20 | T1 | PN | Gase | S.20.RAW (F025166) | serum albumin                                        | gi 28590                   | 69277.9   | 99.50%  | 2  | 2  | 2  | 0.04% | 3.61%  | KVPEVSTPLTVEVSR        | K | N | 95.00% | 0    | 0    | 4.64  | 0    | 0 | 1 | 0 | 0 | 0 | 2       | 1640.92 | 438   | 452   |
| 20 | T1 | PN | Gase | S.20.RAW (F025166) | serum albumin                                        | gi 28590                   | 69277.9   | 99.50%  | 2  | 2  | 2  | 0.04% | 3.61%  | YLYEAKR                | K | R | 92.30% | 40.4 | 41.9 | 0.796 | 0    | 0 | 1 | 0 | 0 | 0 | 2       | 927.49  | 162   | 168   |
| 21 | H9 | PN | Gase | S.21.RAW (F025168) | beta actin                                           | gi 14250401.gi 15277503.g  | 41719.8   | 99.70%  | 2  | 3  | 3  | 0.06% | 14.70% | MKEITALAPSTMK          | K | I | 95.00% | 33.4 | 40.8 | 1.96  | 0    | 0 | 1 | 0 | 0 | 0 | 2       | 1580.8  | 313   | 326   |
| 21 | H9 | PN | Gase | S.21.RAW (F025168) | beta actin                                           | gi 14250401.gi 15277503.g  | 41719.8   | 99.70%  | 2  | 3  | 3  | 0.06% | 14.70% | RIGLTK                 | K | Y | 95.00% | 38   | 42.7 | 1.72  | 0    | 0 | 1 | 0 | 0 | 0 | 2       | 800.54  | 62    | 68    |
| 21 | H9 | PN | Gase | S.21.RAW (F025168) | beta actin                                           | gi 14250401.gi 15277503.g  | 41719.8   | 99.70%  | 2  | 3  | 3  | 0.06% | 14.70% | SVELPDQVITGNER         | K | F | 95.00% | 32.7 | 41.2 | 1.96  | 0    | 0 | 1 | 0 | 0 | 0 | 2       | 1790.89 | 239   | 254   |
| 21 | H9 | PN | Gase | S.21.RAW (F025168) | beta actin                                           | gi 14250401.gi 15277503.g  | 41719.8   | 99.70%  | 2  | 3  | 3  | 0.06% | 14.70% | VAPEHFLLTLEAPLNK       | R | A | 95.00% | 40.6 | 40.8 | 0.67  | 0    | 0 | 1 | 0 | 0 | 0 | 2       | 1984.07 | 40    | 46    |
| 21 | H9 | PN | Gase | S.21.RAW (F025168) | chaperonin (HSP60)                                   | gi 306890                  | 61007.7   | 100.00% | 7  | 8  | 8  | 0.16% | 16.60% | AAVEGHLGGGALLLR        | R | C | 95.00% | 52.4 | 41.1 | 2.96  | 0    | 0 | 0 | 0 | 0 | 0 | 2       | 1684.91 | 300   | 346   |
| 21 | H9 | PN | Gase | S.21.RAW (F025168) | chaperonin (HSP60)                                   | gi 306890                  | 61007.7   | 100.00% | 7  | 8  | 8  | 0.16% | 16.60% | CFEQDAVLLSEKK          | R | I | 94.90% | 39.7 | 41.4 | 1.06  | 0    | 0 | 1 | 0 | 0 | 0 | 2       | 1729.85 | 237   | 250   |
| 21 | H9 | PN | Gase | S.21.RAW (F025168) | chaperonin (HSP60)                                   | gi 306890                  | 61007.7   | 100.00% | 7  | 8  | 8  | 0.16% | 16.60% | ISGQDQVPLAEVNAHR       | R | A | 95.00% | 67.0 | 75   | 4.1   | 3.59 | 0 | 0 | 0 | 0 | 0 | 2       | 1916.07 | 257   | 260   |
| 21 | H9 | PN | Gase | S.21.RAW (F025168) | chaperonin (HSP60)                                   | gi 306890                  | 61007.7   | 100.00% | 7  | 8  | 8  | 0.16% | 16.60% | LKVGLOVAVK             | K | A | 84.50% | 0    | 0    | 1.42  | 0    | 0 | 1 | 0 | 0 | 0 | 2       | 1153.77 | 291   | 301   |
| 21 | H9 | PN | Gase | S.21.RAW (F025168) | chaperonin (HSP60)                                   | gi 306890                  | 61007.7   | 100.00% | 7  | 8  | 8  | 0.16% | 16.60% | LSDGAVLK               | K | V | 87.80% | 0    | 0    | 1.57  | 1    | 0 | 1 | 0 | 0 | 0 | 2       | 901.54  | 397   | 405   |
| 21 | H9 | PN | Gase | S.21.RAW (F025168) | chaperonin (HSP60)                                   | gi 306890                  | 61007.7   | 100.00% | 7  | 8  | 8  | 0.16% | 16.60% | TKLIPAMTIAR            | R | N | 86.00% | 33.6 | 42.6 | 1.18  | 0    | 0 | 1 | 0 | 0 | 0 | 2       | 1186.72 | 471   | 481   |
| 21 | H9 | PN | Gase | S.21.RAW (F025168) | chaperonin (HSP60)                                   | gi 306890                  | 61007.7   | 100.00% | 7  | 8  | 8  | 0.16% | 16.60% | VGVEVTKDDMALLK         | K | L | 85.60% | 43.6 | 40.7 | 5.22  | 0    | 0 | 0 | 0 | 0 | 0 | 2       | 1068.69 | 367   | 359   |
| 21 | H9 | PN | Gase | S.21.RAW (F025168) | serum albumin                                        | gi 25058739                | 71866.9   | 100.00% | 3  | 3  | 3  | 0.06% | 5.90%  | KVPOVSTPLTVEVSR        | K | N | 95.00% | 60.7 | 40.1 | 0     | 0    | 0 | 1 | 0 | 0 | 0 | 2       | 1639.94 | 438   | 452   |
| 21 | H9 | PN | Gase | S.21.RAW (F025168) | serum albumin                                        | gi 25058739                | 71866.9   | 100.00% | 3  | 3  | 3  | 0.06% | 5.90%  | LVNVEVFAK              | K | T | 95.00% | 67.3 | 42.2 | 4.42  | 0    | 0 | 1 | 0 | 0 | 0 | 2       | 1149.62 | 66    | 75    |
| 21 | H9 | PN | Gase | S.21.RAW (F025168) | serum albumin                                        | gi 25058739                | 71866.9   | 100.00% | 3  | 3  | 3  | 0.06% | 5.90%  | YKVDQDISISK            | K | L | 95.00% | 67   | 41.8 | 5.39  | 0    | 0 | 1 | 0 | 0 | 0 | 2       | 1444.84 | 267   | 298   |
| 21 | H9 | PN | Gase | S.21.RAW (F025168) | similar to Prostate, ovary, testis expressed protein | gi 88953569.gi 88953569    | 107266.5  | 100.00% | 2  | 2  | 2  | 0.04% | 2.42%  | SVELPDQVITGNER         | K | F | 95.00% | 32.7 | 41.2 | 1.96  | 0    | 0 | 1 | 0 | 0 | 0 | 2       | 1793.89 | 816   | 817   |
| 22 | H9 | PN | Gase | S.22.RAW (F025169) | beta actin variant                                   | gi 62897825                | 41747.9   | 100.00% | 4  | 4  | 4  | 0.08% | 11.50% | AVFVPSIVGR             | R | P | 91.60% | 0    | 0    | 2.06  | 0    | 0 | 1 | 0 | 0 | 0 | 2       | 945.55  | 29    | 37    |
| 22 | H9 | PN | Gase | S.22.RAW (F025169) | beta actin variant                                   | gi 62897825                | 41747.9   | 100.00% | 4  | 4  | 4  | 0.08% | 11.50% | ETALAPSTMK             | K | I | 95.00% | 30.5 | 42.5 | 1.5   | 0    | 0 | 0 | 0 | 0 | 0 | 2       | 1171.61 | 96    | 113   |
| 22 | H9 | PN | Gase | S.22.RAW (F025169) | beta actin variant                                   | gi 62897825                | 41747.9   | 100.00% | 4  | 4  | 4  | 0.08% | 11.50% | KOLYANTVLSGGTMYPIQADR  | R | M | 95.00% | 53.5 | 40.1 | 1.18  | 0    | 0 | 0 | 0 | 0 | 0 | 2       | 2359.16 | 291   | 312   |
| 22 | H9 | PN | Gase | S.22.RAW (F025169) | beta actin variant                                   | gi 62897825                | 41747.9   | 100.00% | 4  | 4  | 4  | 0.08% | 11.50% | KETALAPSTMK            | R | I | 83.50% | 0    | 0    | 1.52  | 0    | 0 | 1 | 0 | 0 | 0 | 2       | 1305.71 | 313   | 326   |
| 22 | H9 | PN | Gase | S.22.RAW (F025169) | cytokeratin 2                                        | gi 31074629.gi 7705545     | 65883.4   | 99.30%  | 2  | 2  | 2  | 0.04% | 3.76%  | FLEQGKIVLETK           | R | W | 95.00% | 60.2 | 42   | 4.42  | 0    | 0 | 1 | 0 | 0 | 0 | 2       | 1476.81 | 203   | 214   |
| 22 | H9 | PN | Gase | S.22.RAW (F025169) | cytokeratin 2                                        | gi 31074629.gi 7705545     | 65883.4   | 99.30%  | 2  | 2  | 2  | 0.04% | 3.76%  | GAAGAGVLETK            | R | S | 95.00% | 60.2 | 42   | 4.42  | 0    | 0 | 1 | 0 | 0 | 0 | 2       | 1576.64 | 36    | 47    |
| 22 | H9 | PN | Gase | S.22.RAW (F025169) | glucose regulated protein 58kD (GRP58)               | gi 27805905                | 56913.7   | 100.00% | 4  | 4  | 4  | 0.08% | 9.31%  | DPNVIK                 | K | M | 90.10% | 43.1 | 41.7 | -3.22 | 0    | 0 | 1 | 0 | 0 | 0 | 2       | 869.51  | 426   | 433   |
| 22 | H9 | PN | Gase | S.2                |                                                      |                            |           |         |    |    |    |       |        |                        |   |   |        |      |      |       |      |   |   |   |   |   |         |         |       |       |

|    |    |        |          |           |                                                   |                            |          |         |    |    |    |       |        |                    |   |   |        |      |      |         |   |   |   |   |   |         |         |     |     |
|----|----|--------|----------|-----------|---------------------------------------------------|----------------------------|----------|---------|----|----|----|-------|--------|--------------------|---|---|--------|------|------|---------|---|---|---|---|---|---------|---------|-----|-----|
| 23 | H9 | PNGas5 | S_23_RAW | (F025170) | serum albumin                                     | gii11493459.gii178345.gi2  | 69207.8  | 100.00% | 3  | 3  | 3  | 0.06% | 5.58%  | KVPOVSTPTLVEVSR    | K | L | 84.30% | 32.8 | 39.8 | 1.15    | 0 | 0 | 1 | 0 | 0 | 2       | 1639.94 | 438 | 452 |
| 23 | H9 | PNGas5 | S_23_RAW | (F025170) | serum albumin                                     | gii11493459.gii178345.gi2  | 69207.8  | 100.00% | 3  | 3  | 3  | 0.06% | 5.58%  | YICENQDSSISK       | K | N | 95.00% | 42.3 | 41.8 | 5.68    | 0 | 1 | 0 | 0 | 0 | 2       | 1443.64 | 297 | 298 |
| 23 | H9 | PNGas5 | S_23_RAW | (F025170) | serum albumin                                     | gii11493459.gii178345.gi2  | 69207.8  | 100.00% | 3  | 3  | 3  | 0.06% | 5.58%  | YICENQDSSISK       | K | R | 95.00% | 48.4 | 41.9 | 1.6     | 0 | 1 | 0 | 0 | 0 | 2       | 1522.8  | 162 | 168 |
| 23 | H9 | PNGas5 | S_23_RAW | (F025170) | vacuolar H-ATPase B2                              | gii13938355.gii19913428.g  | 55384.7  | 98.80%  | 2  | 2  | 2  | 0.04% | 5.79%  | AVVOVFQEGSDIADK    | K | K | 95.00% | 77.3 | 40.8 | 9.07    | 0 | 1 | 0 | 0 | 0 | 2       | 1520.8  | 84  | 98  |
| 23 | H9 | PNGas5 | S_23_RAW | (F025170) | vacuolar H-ATPase B2                              | gii13938355.gii19913428.g  | 55384.7  | 98.80%  | 2  | 2  | 2  | 0.04% | 5.79%  | Y9AEVHLPLDGTGK     | R | R | 91.80% | 26.5 | 39.9 | 3.66    | 0 | 0 | 1 | 0 | 0 | 2       | 1556.83 | 58  | 71  |
| 24 | H9 | PNGas5 | S_24_RAW | (F025171) | beta actin                                        | gii63355057                | 41986.2  | 99.70%  | 2  | 2  | 2  | 0.04% | 8.51%  | VADEHPILLTEAPLNKR  | R | I | 95.00% | 48.2 | 35.2 | 1.2     | 0 | 0 | 1 | 0 | 0 | 2       | 1954.07 | 179 | 114 |
| 24 | H9 | PNGas5 | S_24_RAW | (F025171) | chaperonin containing TCP1, subunit 8 (beta)      | gii1136741                 | 58485    | 100.00% | 3  | 3  | 3  | 0.06% | 7.61%  | AIDTGANVVTGGK      | K | V | 95.00% | 116  | 40.6 | 1.34    | 0 | 0 | 1 | 0 | 0 | 2       | 1372.74 | 282 | 296 |
| 24 | H9 | PNGas5 | S_24_RAW | (F025171) | chaperonin containing TCP1, subunit 8 (beta)      | gii1136741                 | 58485    | 100.00% | 3  | 3  | 3  | 0.06% | 7.61%  | NIQAQKELATGR       | R | T | 95.00% | 55.3 | 41   | 0.721   | 0 | 0 | 0 | 1 | 0 | 2       | 1532.79 | 32  | 44  |
| 24 | H9 | PNGas5 | S_24_RAW | (F025171) | chaperonin containing TCP1, subunit 8 (beta)      | gii1136741                 | 58485    | 100.00% | 3  | 3  | 3  | 0.06% | 7.61%  | NIQAQKELATGR       | R | V | 95.00% | 35.6 | 41.1 | 7.02    | 0 | 0 | 0 | 1 | 0 | 2       | 1528.83 | 153 | 164 |
| 24 | H9 | PNGas5 | S_24_RAW | (F025171) | copine 1                                          | gii23397704.gii48145697    | 59088.6  | 99.90%  | 2  | 2  | 2  | 0.04% | 5.59%  | YGTIVYAEQDKDNR     | R | V | 95.00% | 48   | 41.7 | 1.89    | 0 | 0 | 1 | 0 | 0 | 2       | 1531.81 | 125 | 138 |
| 24 | H9 | PNGas5 | S_24_RAW | (F025171) | copine 1                                          | gii23397704.gii48145697    | 59088.6  | 99.90%  | 2  | 2  | 2  | 0.04% | 5.59%  | LYGTNFAPIINHAVR    | R | F | 95.00% | 55.3 | 41.8 | 1.96    | 0 | 0 | 0 | 1 | 0 | 2       | 1782.97 | 385 | 400 |
| 24 | H9 | PNGas5 | S_24_RAW | (F025171) | ER-60 protease (Protein disulfide isomerase fa)   | gii1208427.gii21361657.gi  | 56780.5  | 100.00% | 9  | 9  | 10 | 0.19% | 21.60% | FEDKTVAYTEGK       | K | M | 95.00% | 33.8 | 41.6 | 2.96    | 0 | 0 | 1 | 0 | 0 | 2       | 1458.71 | 215 | 226 |
| 24 | H9 | PNGas5 | S_24_RAW | (F025171) | ER-60 protease (Protein disulfide isomerase fa)   | gii1208427.gii21361657.gi  | 56780.5  | 100.00% | 9  | 9  | 10 | 0.19% | 21.60% | LDAGHGLNFAVSR      | K | K | 95.00% | 72.9 | 40.8 | 4.36    | 0 | 0 | 1 | 0 | 0 | 2       | 1645.89 | 290 | 304 |
| 24 | H9 | PNGas5 | S_24_RAW | (F025171) | ER-60 protease (Protein disulfide isomerase fa)   | gii1208427.gii21361657.gi  | 56780.5  | 100.00% | 9  | 9  | 10 | 0.19% | 21.60% | FVMEEFPSR          | K | D | 95.00% | 41   | 42.5 | 1.38    | 0 | 1 | 0 | 0 | 0 | 2       | 1188.54 | 336 | 344 |
| 24 | H9 | PNGas5 | S_24_RAW | (F025171) | ER-60 protease (Protein disulfide isomerase fa)   | gii1208427.gii21361657.gi  | 56780.5  | 100.00% | 9  | 9  | 10 | 0.19% | 21.60% | IFRDGEEAGYDGGPR    | K | T | 94.20% | 0    | 0    | 2.42    | 0 | 0 | 2 | 0 | 0 | 2       | 1652.77 | 105 | 119 |
| 24 | H9 | PNGas5 | S_24_RAW | (F025171) | ER-60 protease (Protein disulfide isomerase fa)   | gii1208427.gii21361657.gi  | 56780.5  | 100.00% | 9  | 9  | 10 | 0.19% | 21.60% | LDAGHGLNFAVSR      | K | V | 95.00% | 27.8 | 42.1 | 2.5     | 0 | 1 | 0 | 0 | 2 | 1308.64 | 74      | 82  |     |
| 24 | H9 | PNGas5 | S_24_RAW | (F025171) | ER-60 protease (Protein disulfide isomerase fa)   | gii1208427.gii21361657.gi  | 56780.5  | 100.00% | 9  | 9  | 10 | 0.19% | 21.60% | LSKDPNVIADK        | K | M | 92.50% | 20.9 | 42.1 | 2.24    | 0 | 1 | 0 | 0 | 0 | 2       | 1197.72 | 423 | 433 |
| 24 | H9 | PNGas5 | S_24_RAW | (F025171) | ER-60 protease (Protein disulfide isomerase fa)   | gii1208427.gii21361657.gi  | 56780.5  | 100.00% | 9  | 9  | 10 | 0.19% | 21.60% | QAQPASVPLRTEFFPKK  | K | F | 94.40% | 0    | 0    | 2.44    | 0 | 0 | 1 | 0 | 0 | 2       | 1887    | 131 | 147 |
| 24 | H9 | PNGas5 | S_24_RAW | (F025171) | ER-60 protease (Protein disulfide isomerase fa)   | gii1208427.gii21361657.gi  | 56780.5  | 100.00% | 9  | 9  | 10 | 0.19% | 21.60% | TADIVSHLKK         | R | Q | 93.50% | 44.2 | 42.1 | 0.0809  | 0 | 0 | 0 | 1 | 0 | 2       | 1168.67 | 120 | 130 |
| 24 | H9 | PNGas5 | S_24_RAW | (F025171) | ER-60 protease (Protein disulfide isomerase fa)   | gii1208427.gii21361657.gi  | 56780.5  | 100.00% | 9  | 9  | 10 | 0.19% | 21.60% | YGVSYGYPTLTK       | K | I | 95.00% | 61.1 | 40.7 | 6       | 0 | 1 | 0 | 0 | 2 | 1084.57 | 95      | 104 |     |
| 24 | H9 | PNGas5 | S_24_RAW | (F025171) | integrin alpha-4 subunit                          | gii34190805.gii67191027    | 114883.8 | 99.70%  | 2  | 2  | 2  | 0.04% | 3.68%  | SQHTTEVGGAPQHQEIQK | R | A | 95.00% | 32.4 | 40.9 | 2.34    | 0 | 0 | 1 | 0 | 0 | 2       | 2003    | 262 | 280 |
| 24 | H9 | PNGas5 | S_24_RAW | (F025171) | integrin alpha-4 subunit                          | gii34190805.gii67191027    | 114883.8 | 99.70%  | 2  | 2  | 2  | 0.04% | 3.68%  | TRPVVDASSLHSEPVNR  | R | T | 95.00% | 57.1 | 40.7 | 6.82    | 0 | 0 | 1 | 0 | 0 | 2       | 2076.12 | 463 | 481 |
| 25 | H9 | PNGas5 | S_25_RAW | (F025173) | cell division cycle 2-like 5 (cholesterase-relat) | gii1110387.gii14110390.gi  | 164910.6 | 99.50%  | 2  | 2  | 2  | 0.04% | 1.26%  | GQIKLADFLGAR       | R | L | 88.50% | 29.3 | 40.6 | 1.59    | 0 | 0 | 1 | 0 | 0 | 2       | 1288.74 | 849 | 860 |
| 25 | H9 | PNGas5 | S_25_RAW | (F025173) | ER-60 protease (Protein disulfide isomerase fa)   | gii1208427.gii21361657.gi  | 56780.5  | 100.00% | 15 | 17 | 19 | 0.36% | 29.70% | DPNVIADK           | K | M | 87.50% | 40.1 | 41.7 | 0.102   | 1 | 0 | 0 | 0 | 0 | 2       | 869.51  | 426 | 433 |
| 25 | H9 | PNGas5 | S_25_RAW | (F025173) | ER-60 protease (Protein disulfide isomerase fa)   | gii1208427.gii21361657.gi  | 56780.5  | 100.00% | 15 | 17 | 19 | 0.36% | 29.70% | ELSDSIFLOR         | R | E | 95.00% | 0    | 0    | 3.25    | 0 | 1 | 0 | 0 | 0 | 2       | 1370.7  | 472 | 482 |
| 25 | H9 | PNGas5 | S_25_RAW | (F025173) | ER-60 protease (Protein disulfide isomerase fa)   | gii1208427.gii21361657.gi  | 56780.5  | 100.00% | 15 | 17 | 19 | 0.36% | 29.70% | FLDAGHGLNFAVSR     | K | K | 95.00% | 0    | 0    | 3.55    | 0 | 1 | 0 | 0 | 0 | 2       | 1645.88 | 290 | 304 |
| 25 | H9 | PNGas5 | S_25_RAW | (F025173) | ER-60 protease (Protein disulfide isomerase fa)   | gii1208427.gii21361657.gi  | 56780.5  | 100.00% | 15 | 17 | 19 | 0.36% | 29.70% | FLDQVFDGKLR        | K | R | 95.00% | 51.3 | 40.6 | 1       | 0 | 1 | 0 | 0 | 0 | 2       | 1515.76 | 352 | 363 |
| 25 | H9 | PNGas5 | S_25_RAW | (F025173) | ER-60 protease (Protein disulfide isomerase fa)   | gii1208427.gii21361657.gi  | 56780.5  | 100.00% | 15 | 17 | 19 | 0.36% | 29.70% | FVMEEFPSR          | K | D | 95.00% | 68.5 | 42.3 | 1.7     | 0 | 0 | 0 | 0 | 2 | 1172.54 | 161     | 174 |     |
| 25 | H9 | PNGas5 | S_25_RAW | (F025173) | ER-60 protease (Protein disulfide isomerase fa)   | gii1208427.gii21361657.gi  | 56780.5  | 100.00% | 15 | 17 | 19 | 0.36% | 29.70% | FVMEEFPSRDKG       | K | A | 95.00% | 38.5 | 41.5 | 3.48    | 0 | 0 | 1 | 0 | 0 | 2       | 1488.68 | 336 | 347 |
| 25 | H9 | PNGas5 | S_25_RAW | (F025173) | ER-60 protease (Protein disulfide isomerase fa)   | gii1208427.gii21361657.gi  | 56780.5  | 100.00% | 15 | 17 | 19 | 0.36% | 29.70% | IFRDGEEAGYDGGPR    | K | T | 95.00% | 37   | 41.4 | 3.16    | 0 | 0 | 3 | 0 | 0 | 2       | 1652.77 | 105 | 119 |
| 25 | H9 | PNGas5 | S_25_RAW | (F025173) | ER-60 protease (Protein disulfide isomerase fa)   | gii1208427.gii21361657.gi  | 56780.5  | 100.00% | 15 | 17 | 19 | 0.36% | 29.70% | IFRDGEEAGYDGGPR    | K | V | 95.00% | 40.4 | 42.3 | 0.9     | 0 | 0 | 1 | 0 | 0 | 2       | 1123.66 | 153 | 164 |
| 25 | H9 | PNGas5 | S_25_RAW | (F025173) | ER-60 protease (Protein disulfide isomerase fa)   | gii1208427.gii21361657.gi  | 56780.5  | 100.00% | 15 | 17 | 19 | 0.36% | 29.70% | LAPEYEAATR         | R | L | 91.60% | 40.4 | 42.8 | 7.96    | 1 | 1 | 0 | 0 | 0 | 2       | 1119.61 | 63  | 73  |
| 25 | H9 | PNGas5 | S_25_RAW | (F025173) | ER-60 protease (Protein disulfide isomerase fa)   | gii1208427.gii21361657.gi  | 56780.5  | 100.00% | 15 | 17 | 19 | 0.36% | 29.70% | LSKDPNVIADK        | K | M | 95.00% | 49.1 | 42.1 | 2.47    | 0 | 0 | 1 | 0 | 0 | 2       | 1197.72 | 423 | 433 |
| 25 | H9 | PNGas5 | S_25_RAW | (F025173) | ER-60 protease (Protein disulfide isomerase fa)   | gii1208427.gii21361657.gi  | 56780.5  | 100.00% | 15 | 17 | 19 | 0.36% | 29.70% | QAQPASVPLR         | K | T | 95.00% | 84.3 | 42   | 2.22    | 0 | 1 | 0 | 0 | 0 | 2       | 995.56  | 131 | 140 |
| 25 | H9 | PNGas5 | S_25_RAW | (F025173) | ER-60 protease (Protein disulfide isomerase fa)   | gii1208427.gii21361657.gi  | 56780.5  | 100.00% | 15 | 17 | 19 | 0.36% | 29.70% | YGVSYGYPTLTK       | K | I | 95.00% | 61.1 | 40.7 | 6       | 0 | 1 | 0 | 0 | 2 | 1084.57 | 95      | 104 |     |
| 25 | H9 | PNGas5 | S_25_RAW | (F025173) | ER-60 protease (Protein disulfide isomerase fa)   | gii1208427.gii21361657.gi  | 56780.5  | 100.00% | 15 | 17 | 19 | 0.36% | 29.70% | VVAENFENNVNENK     | K | D | 94.30% | 43.2 | 40.2 | -0.0792 | 0 | 0 | 1 | 0 | 0 | 2       | 1832.9  | 380 | 395 |
| 25 | H9 | PNGas5 | S_25_RAW | (F025173) | ER-60 protease (Protein disulfide isomerase fa)   | gii1208427.gii21361657.gi  | 56780.5  | 100.00% | 15 | 17 | 19 | 0.36% | 29.70% | YGVSYGYPTLTK       | K | I | 95.00% | 46.2 | 42.1 | 4.66    | 0 | 2 | 0 | 0 | 0 | 2       | 1084.57 | 95  | 104 |
| 25 | H9 | PNGas5 | S_25_RAW | (F025173) | heat shock 70kDa protein B isoform 2 variant      | gii62898815                | 53482.8  | 99.80%  | 2  | 2  | 2  | 0.04% | 5.88%  | STAGDTLGGDFDNRK    | M | N | 95.00% | 32.5 | 38.7 | 1.85    | 0 | 0 | 1 | 0 | 0 | 2       | 1691.73 | 221 | 236 |
| 25 | H9 | PNGas5 | S_25_RAW | (F025173) | heat shock 70kDa protein B isoform 2 variant      | gii62898815                | 53482.8  | 99.80%  | 2  | 2  | 2  | 0.04% | 5.88%  | STAGDTLGGDFDNRK    | R | N | 95.00% | 47.8 | 39.9 | 0.42    | 0 | 0 | 1 | 0 | 0 | 2       | 1407.67 | 201 | 210 |
| 25 | H9 | PNGas5 | S_25_RAW | (F025173) | T complex protein 1                               | gii36796.gii57863257.gii57 | 43869    | 100.00% | 3  | 3  | 3  | 0.06% | 9.23%  | LGQVIVITPEKDLDIR   | K | Q | 95.00% | 61.6 | 39.6 | 5       | 0 | 0 | 1 | 0 | 0 | 2       | 1923.09 | 333 | 349 |
| 25 | H9 | PNGas5 | S_25_RAW | (F025173) | T complex protein 1                               | gii36796.gii57863257.gii57 | 43869    | 100.00% | 3  | 3  | 3  | 0.06% | 9.23%  | YGVSYGYPTLTK       | K | I | 95.00% | 59.5 | 42.4 | 4.64    | 0 | 0 | 1 | 0 | 0 | 2       | 1465.05 | 25  | 35  |
| 26 | H9 | PNGas5 | S_26_RAW | (F025174) | glucose regulated protein 58kD (GRP58)            | gii27805905                | 56913.7  | 100.00% | 3  | 4  | 5  | 0.10% | 5.94%  | FVMEEFPSR          | K | L | 95.00% | 57.4 | 42.3 | 3.47    | 0 | 2 | 0 | 0 | 0 | 2       | 1172.54 | 336 | 344 |
| 26 | H9 | PNGas5 | S_26_RAW | (F025174) | glucose regulated protein 58kD (GRP58)            | gii27805905                | 56913.7  | 100.00% | 3  | 4  | 5  | 0.10% | 5.94%  | LAPEYEAATR         | K | L | 95.00% | 83.8 | 42.8 | 6.28    | 0 | 2 | 0 | 0 | 0 | 2       | 1191.63 | 63  | 73  |
| 26 | H9 | PNGas5 | S_26_RAW | (F025174) | glucose regulated protein 58kD (GRP58)            | gii27805905                | 56913.7  | 100.00% | 3  | 4  | 5  | 0.10% | 5.94%  | YGVSYGYPTLTK       | K | I | 95.00% | 22.3 | 41.3 | 2.24    | 0 | 1 | 0 | 0 | 0 | 2       | 1084.57 | 95  | 104 |
| 27 | H9 | PNGas5 | S_27_RAW | (F025175) | beta actin                                        | gii178045                  | 25861.8  | 100.00% | 4  | 4  | 4  | 0.08% | 19.40% | YQSFYTTAER         | R | E | 95.00% | 86.1 | 42.4 | 5.14    | 0 | 1 | 0 | 0 | 0 | 2       | 1132.53 | 54  | 63  |
| 27 | H9 | PNGas5 | S_27_RAW | (F025175) | beta actin                                        | gii178045                  | 25861.8  | 100.00% | 4  | 4  | 4  | 0.08% | 19.40% | MOKKITALPSTMK      | R | I | 81.90% | 20.4 | 41.6 | 1.57    | 0 | 0 | 1 | 0 | 0 | 2       | 1579    |     |     |

|    |    |         |                    |                                                               |                           |          |         |   |    |    |       |        |                      |   |   |        |      |      |        |   |   |   |   |         |         |      |      |
|----|----|---------|--------------------|---------------------------------------------------------------|---------------------------|----------|---------|---|----|----|-------|--------|----------------------|---|---|--------|------|------|--------|---|---|---|---|---------|---------|------|------|
| 32 | H9 | PNase   | S_32 RAW (F025181) | pan-leukocyte antigen                                         | g 180139.g 48146141.g 5   | 27665.4  | 100.00% | 6 | 9  | 9  | 0.17% | 24.70% | IKLQVLDVPPKVIK       | K | I | 82.30% | 0    | 0    | 1.84   | 0 | 1 | 0 | 2 | 1687.09 | 123     | 137  |      |
| 32 | H9 | PNase   | S_32 RAW (F025181) | pan-leukocyte antigen                                         | g 180139.g 48146141.g 5   | 27665.4  | 100.00% | 6 | 9  | 9  | 0.17% | 24.70% | LQVLDVPPKVIK         | K | I | 95.00% | 68.1 | 40.8 | 3.96   | 0 | 1 | 1 | 0 | 2       | 1445.91 | 125  | 137  |
| 32 | H9 | PNase   | S_32 RAW (F025181) | RAN protein 2                                                 | g 32425497.g 4902954.g 2  | 24437.9  | 99.40%  | 2 | 2  | 2  | 0.04% | 10.30% | LVLDVPPKQEK          | K | F | 90.00% | 69.2 | 41   | 0.77   | 0 | 0 | 1 | 0 | 2       | 1294.61 | 61   | 71   |
| 32 | H9 | PNase   | S_32 RAW (F025181) | RAN protein                                                   | g 32425497.g 4902954.g 2  | 24437.9  | 99.40%  | 2 | 2  | 2  | 0.04% | 10.20% | LVLDGDDGKTK          | K | N | 90.30% | 31.3 | 40.9 | 1.75   | 0 | 1 | 0 | 0 | 2       | 1015.58 | 13   | 23   |
| 32 | H9 | PNase   | S_32 RAW (F025181) | triosephosphate isomerase 1                                   | g 17398915.g 4507645.g 1  | 26193.9  | 99.90%  | 2 | 2  | 2  | 0.04% | 12.50% | IVYGSVITGATCK        | R | E | 95.00% | 96.6 | 41.8 | 1.19   | 0 | 1 | 0 | 0 | 2       | 1326.67 | 206  | 218  |
| 32 | H9 | PNase   | S_32 RAW (F025181) | triosephosphate isomerase 1                                   | g 17398915.g 4507645.g 1  | 26193.9  | 99.90%  | 2 | 2  | 2  | 0.04% | 12.50% | IVYGSVITGATCK        | R | E | 95.00% | 96.6 | 41.8 | 1.19   | 0 | 1 | 0 | 0 | 2       | 1807.89 | 113  | 130  |
| 33 | H9 | PNase   | S_33 RAW (F025182) | polyubiquitin C                                               | g 1304129                 | 68708.4  | 100.00% | 8 | 9  | 11 | 0.22% | 9.88%  | LIFAGKQLEDRG         | R | T | 95.00% | 29.7 | 40.7 | 4.38   | 0 | 1 | 0 | 0 | 2       | 1346.74 | 43   | 54   |
| 33 | H9 | PNase   | S_33 RAW (F025182) | polyubiquitin C                                               | g 1304128                 | 68708.4  | 100.00% | 8 | 9  | 11 | 0.22% | 9.88%  | TITLEVFPSTIEANVK     | K | A | 95.00% | 66.9 | 41.6 | 7.22   | 0 | 1 | 0 | 0 | 2       | 1789.93 | 12   | 27   |
| 33 | H9 | PNase   | S_33 RAW (F025182) | polyubiquitin C                                               | g 1304128                 | 68708.4  | 100.00% | 8 | 9  | 11 | 0.22% | 9.88%  | TLSYDVIQIK           | R | E | 95.00% | 68.9 | 42   | -2.79  | 0 | 2 | 0 | 0 | 2       | 1081.55 | 55   | 63   |
| 34 | T1 | control | S_34 RAW (F025183) | Dystonin                                                      | g 34570747.g 34577049.g 0 | 587668.8 | 99.90%  | 2 | 2  | 2  | 0.04% | 8.41%  | SDLEAGVDELK          | K | E | 83.00% | 75.5 | 42.2 | 5      | 0 | 1 | 0 | 0 | 2       | 1408.66 | 289  | 261  |
| 34 | T1 | control | S_34 RAW (F025183) | Dystonin                                                      | g 34577047.g 34577049.g 0 | 587668.8 | 99.90%  | 2 | 2  | 2  | 0.04% | 0.41%  | SPASKLQK             | R | E | 95.00% | 32.4 | 41.9 | 21.3   | 0 | 1 | 0 | 0 | 2       | 845.47  | 5133 | 5104 |
| 34 | T1 | control | S_34 RAW (F025183) | fas-like protein                                              | g 1040970                 | 5359.1   | 99.90%  | 2 | 2  | 2  | 0.04% | 5.11%  | GGMGSDRRGGFNK        | R | F | 95.00% | 31.9 | 42   | 2.05   | 0 | 1 | 0 | 0 | 2       | 1255.55 | 255  | 267  |
| 36 | T1 | control | S_36 RAW (F025185) | type I keratin                                                | g 186685                  | 50682.1  | 99.50%  | 2 | 2  | 2  | 0.04% | 5.75%  | ALEEANADLVYK         | R | I | 95.00% | 86   | 40.3 | 4.46   | 0 | 1 | 0 | 0 | 2       | 1301.86 | 135  | 146  |
| 36 | T1 | control | S_36 RAW (F025185) | type I keratin                                                | g 186685                  | 50682.1  | 99.50%  | 2 | 2  | 2  | 0.04% | 5.75%  | YVGGGGGGSSSR         | K | I | 89.10% | 0    | 0    | 2.86   | 0 | 0 | 1 | 0 | 2       | 1235.98 | 16   | 30   |
| 36 | T1 | control | S_36 RAW (F025185) | type I keratin                                                | g 2950168                 | 47213.6  | 99.30%  | 2 | 3  | 3  | 0.06% | 8.41%  | LNVEVDAPTVLNR        | R | V | 95.00% | 62.8 | 41.6 | 7.5    | 0 | 1 | 0 | 0 | 2       | 1625.85 | 209  | 223  |
| 36 | T1 | control | S_36 RAW (F025185) | type I keratin                                                | g 2950168                 | 47213.6  | 99.30%  | 2 | 3  | 3  | 0.06% | 8.41%  | LVQVINDAK            | R | L | 85.00% | 40.3 | 42.4 | -0.94  | 1 | 1 | 0 | 0 | 2       | 999.58  | 127  | 135  |
| 36 | T1 | control | S_36 RAW (F025185) | type I keratin                                                | g 2950168                 | 47213.6  | 99.30%  | 2 | 3  | 3  | 0.06% | 8.41%  | SDLEAGVDELK          | K | E | 83.00% | 75.5 | 42.2 | 5      | 0 | 1 | 0 | 0 | 2       | 1218.52 | 174  | 184  |
| 37 | T1 | control | S_37 RAW (F025186) | migration inhibitory factor-related protein 14                | g 20150236.g 29126810.g 0 | 13077    | 99.90%  | 2 | 2  | 2  | 0.04% | 20.40% | KOLNLFK              | K | K | 95.00% | 53.3 | 42.7 | 1.02   | 0 | 1 | 0 | 0 | 2       | 1005.57 | 42   | 49   |
| 37 | T1 | control | S_37 RAW (F025186) | migration inhibitory factor-related protein 14                | g 20150236.g 29126810.g 0 | 13077    | 99.90%  | 2 | 2  | 2  | 0.04% | 20.40% | VEIHMDLDTNAIK        | K | Q | 95.00% | 64.8 | 40.5 | 4.27   | 0 | 1 | 0 | 0 | 2       | 1758.82 | 57   | 71   |
| 37 | T1 | control | S_37 RAW (F025186) | psoriasis                                                     | g 12053626.g 29168101.g 0 | 10399.8  | 99.30%  | 2 | 2  | 2  | 0.04% | 13.50% | GTVNLADVFEK          | K | K | 95.00% | 41.1 | 42.1 | 5.08   | 0 | 1 | 0 | 0 | 2       | 1256.62 | 51   | 61   |
| 37 | T1 | control | S_37 RAW (F025186) | psoriasis                                                     | g 12053626.g 29168101.g 0 | 10399.8  | 99.30%  | 2 | 2  | 2  | 0.04% | 13.50% | GTVNLADVFEK          | K | D | 86.30% | 38.8 | 40.1 | 0.469  | 0 | 1 | 0 | 0 | 2       | 1384.71 | 51   | 62   |
| 38 | T1 | control | S_38 RAW (F025187) | annexin VIII isoform 1                                        | g 4502111.g 4809279.g 5   | 52722.5  | 99.90%  | 2 | 2  | 2  | 0.05% | 6.56%  | FGTDEQAQVIVANR       | K | S | 95.00% | 70.2 | 42.3 | 6.25   | 0 | 1 | 0 | 0 | 2       | 1690.84 | 200  | 215  |
| 38 | T1 | control | S_38 RAW (F025187) | annexin VIII isoform 1                                        | g 4502111.g 4809279.g 5   | 52722.5  | 99.90%  | 2 | 2  | 2  | 0.05% | 6.56%  | TLGTMIADGTSQDYYR     | K | L | 95.00% | 47.7 | 41.4 | 1.35   | 0 | 1 | 0 | 0 | 2       | 1729.82 | 465  | 480  |
| 38 | T1 | control | S_38 RAW (F025187) | RuvB-like 2                                                   | g 12653319                | 51140.1  | 99.80%  | 2 | 2  | 2  | 0.05% | 4.75%  | QVTVVDQDK            | K | R | 95.00% | 64.6 | 42.4 | 3.54   | 0 | 1 | 0 | 0 | 2       | 1320.63 | 224  | 234  |
| 38 | T1 | control | S_38 RAW (F025187) | RuvB-like 2                                                   | g 12653319                | 51140.1  | 99.80%  | 2 | 2  | 2  | 0.05% | 4.75%  | QVTVVDQDK            | K | R | 95.00% | 61.5 | 41   | 1.17   | 0 | 0 | 1 | 0 | 2       | 1259.66 | 418  | 428  |
| 38 | T1 | control | S_38 RAW (F025187) | serum albumin                                                 | g 11493459.g 178345.g 2   | 69376.1  | 99.80%  | 2 | 2  | 2  | 0.05% | 3.61%  | KVQVSTPTLVEYSR       | K | N | 95.00% | 90.9 | 41.4 | 2.34   | 0 | 1 | 0 | 0 | 2       | 1639.94 | 438  | 452  |
| 38 | T1 | control | S_38 RAW (F025187) | serum albumin                                                 | g 11493459.g 178345.g 2   | 69376.1  | 99.80%  | 2 | 2  | 2  | 0.05% | 3.61%  | VPQVSTPTLVEYSR       | K | N | 95.00% | 82.4 | 41.6 | 0      | 0 | 1 | 0 | 0 | 2       | 1511.84 | 439  | 452  |
| 38 | T1 | control | S_38 RAW (F025187) | serum albumin                                                 | g 11493459.g 178345.g 2   | 69376.1  | 99.80%  | 2 | 2  | 2  | 0.05% | 3.61%  | YLYEAYR              | K | R | 95.00% | 46.3 | 41.9 | 1.13   | 0 | 1 | 0 | 0 | 2       | 1277.41 | 162  | 168  |
| 39 | T1 | control | S_39 RAW (F025188) | beta actin variant                                            | g 62897625                | 41747.9  | 100.00% | 4 | 4  | 4  | 0.10% | 10.90% | LDLTKLTK             | K | I | 95.00% | 41.7 | 41.5 | 2.82   | 0 | 1 | 0 | 0 | 2       | 1014.48 | 316  | 329  |
| 39 | T1 | control | S_39 RAW (F025188) | beta actin variant                                            | g 62897625                | 41747.9  | 100.00% | 4 | 4  | 4  | 0.10% | 10.90% | EYLAARSTMK           | K | I | 95.00% | 33.8 | 42.3 | 2.36   | 0 | 1 | 0 | 0 | 2       | 927.89  | 316  | 326  |
| 39 | T1 | control | S_39 RAW (F025188) | beta actin variant                                            | g 62897625                | 41747.9  | 100.00% | 4 | 4  | 4  | 0.10% | 10.90% | LDLADGKLDLTKML       | R | I | 81.60% | 28   | 41.3 | 1.51   | 0 | 0 | 1 | 0 | 2       | 1639.84 | 178  | 191  |
| 39 | T1 | control | S_39 RAW (F025188) | beta actin variant                                            | g 62897625                | 41747.9  | 100.00% | 4 | 4  | 4  | 0.10% | 10.90% | SEFVPLDQVQNGER       | K | R | 95.00% | 24.4 | 42.4 | 2.86   | 0 | 1 | 0 | 0 | 2       | 1760.89 | 259  | 290  |
| 39 | T1 | control | S_39 RAW (F025188) | chaperonin containing TCP1, subunit 5 (epsilon)               | g 14495685.g 0            | 43014.6  | 100.00% | 2 | 2  | 2  | 0.05% | 4.91%  | MLVROCK              | K | N | 95.00% | 32.4 | 42.4 | 2.24   | 0 | 1 | 0 | 0 | 2       | 1020.52 | 217  | 224  |
| 39 | T1 | control | S_39 RAW (F025188) | chaperonin containing TCP1, subunit 5 (epsilon)               | g 14495685.g 0            | 43014.6  | 100.00% | 2 | 2  | 2  | 0.05% | 4.91%  | QQISLATQMYR          | K | V | 95.00% | 49.6 | 40.7 | 1.03   | 0 | 1 | 0 | 0 | 2       | 1290.68 | 361  | 371  |
| 39 | T1 | control | S_39 RAW (F025188) | chaperonin containing TCP1, subunit 8 (theta)                 | g 1136741.g 31418053.g 0  | 58485    | 99.80%  | 2 | 2  | 2  | 0.05% | 4.82%  | AIADTGANVITGGK       | K | M | 95.00% | 134  | 41.1 | 2.89   | 0 | 1 | 0 | 0 | 2       | 1372.74 | 282  | 296  |
| 39 | T1 | control | S_39 RAW (F025188) | chaperonin containing TCP1, subunit 8 (theta)                 | g 1136741.g 31418053.g 0  | 58485    | 99.80%  | 2 | 2  | 2  | 0.05% | 4.82%  | IFNMGVTLVLR          | R | I | 95.00% | 32.5 | 42   | 3.11   | 0 | 1 | 0 | 0 | 2       | 1282.67 | 505  | 519  |
| 39 | T1 | control | S_39 RAW (F025188) | dihydropyrimidinase-like 2 variant                            | g 45501286.g 62898846     | 62276    | 99.90%  | 2 | 2  | 2  | 0.05% | 6.47%  | DIGAAPVHAENDIGAEQQOR | R | I | 95.00% | 53.1 | 40.1 | 3.15   | 0 | 1 | 0 | 0 | 2       | 2377.18 | 190  | 211  |
| 39 | T1 | control | S_39 RAW (F025188) | dihydropyrimidinase-like 2 variant                            | g 45501286.g 62898846     | 62276    | 99.90%  | 2 | 2  | 2  | 0.05% | 6.47%  | GLDYGQVCEVSTPK       | R | I | 95.00% | 76   | 41.5 | 4.8    | 0 | 1 | 0 | 0 | 2       | 1620.8  | 497  | 511  |
| 39 | T1 | control | S_39 RAW (F025188) | protein disulfide isomerase family A, member                  | g 1208427.g 21361657.g 0  | 56663.5  | 100.00% | 6 | 9  | 9  | 0.22% | 13.70% | FLDAGHKLNFVAYSR      | K | K | 95.00% | 47.9 | 41.5 | 0.638  | 0 | 2 | 0 | 0 | 2       | 1645.88 | 290  | 304  |
| 39 | T1 | control | S_39 RAW (F025188) | protein disulfide isomerase family A, member                  | g 1208427.g 21361657.g 0  | 56663.5  | 100.00% | 6 | 9  | 9  | 0.22% | 13.70% | FLDAGHKLNFVAYSR      | K | R | 95.00% | 47.9 | 41.5 | 0.638  | 0 | 2 | 0 | 0 | 2       | 1645.88 | 290  | 304  |
| 39 | T1 | control | S_39 RAW (F025188) | protein disulfide isomerase family A, member                  | g 1208427.g 21361657.g 0  | 56663.5  | 100.00% | 6 | 9  | 9  | 0.22% | 13.70% | IFRDDEEAGAYDQPR      | K | T | 95.00% | 36   | 41.7 | 1.92   | 0 | 1 | 0 | 0 | 2       | 1652.77 | 105  | 119  |
| 39 | T1 | control | S_39 RAW (F025188) | protein disulfide isomerase family A, member                  | g 1208427.g 21361657.g 0  | 56663.5  | 100.00% | 6 | 9  | 9  | 0.22% | 13.70% | LSKDPNVIK            | K | M | 95.00% | 76.5 | 41.2 | 4.02   | 0 | 1 | 1 | 0 | 2       | 1197.72 | 423  | 433  |
| 39 | T1 | control | S_39 RAW (F025188) | protein disulfide isomerase family A, member                  | g 1208427.g 21361657.g 0  | 56663.5  | 100.00% | 6 | 9  | 9  | 0.22% | 13.70% | SEFVPLDQVQNGER       | K | R | 95.00% | 24.4 | 42.4 | 2.86   | 0 | 1 | 0 | 0 | 2       | 1368.57 | 367  | 379  |
| 39 | T1 | control | S_39 RAW (F025188) | protein disulfide isomerase family A, member                  | g 1208427.g 21361657.g 0  | 56663.5  | 100.00% | 6 | 9  | 9  | 0.22% | 13.70% | YLYKSEIPESNDQPK      | K | V | 95.00% | 41.2 | 39.6 | 1.7    | 0 | 1 | 0 | 0 | 2       | 1177.91 | 364  | 379  |
| 39 | T1 | control | S_39 RAW (F025188) | serum albumin                                                 | g 28590                   | 69277.9  | 99.50%  | 2 | 3  | 3  | 0.07% | 3.61%  | KVPEVSTPTLVEYSR      | K | N | 90.40% | 0    | 0    | 2.14   | 0 | 1 | 0 | 0 | 2       | 1640.92 | 438  | 452  |
| 39 | T1 | control | S_39 RAW (F025188) | serum albumin                                                 | g 28590                   | 69277.9  | 99.50%  | 2 | 3  | 3  | 0.07% | 3.61%  | YLYEAYR              | K | R | 95.00% | 44.1 | 41.9 | 0.678  | 0 | 2 | 0 | 0 | 2       | 927.49  | 162  | 168  |
| 40 | H9 | control | S_40 RAW (F025189) | ER-60 protease (Protein disulfide isomerase family A, member) | g 1208427.g 21361657.g 0  | 56780.5  | 100.00% | 8 | 10 | 11 | 0.26% | 22.80% | FLDAGHKLNFVAYSR      | K | R | 95.00% | 47.9 | 41.5 | 0.638  | 0 | 2 | 0 | 0 | 2       | 1645.88 | 290  | 304  |
| 40 | H9 | control | S_40 RAW (F025189) | ER-60 protease (Protein disulfide isomerase family A, member) | g 1208427.g 21361657.g 0  | 56780.5  | 100.00% | 8 | 10 | 11 | 0.26% | 22.80% | FLODYGDKLNR          | K | Y | 95.00% | 46.9 | 40   | -0.255 | 0 | 1 | 0 | 0 | 2       | 1515.76 | 352  | 363  |
| 40 | H9 | control | S_40 RAW (F025189) | ER-60 protease (Protein disulfide isomerase family A, member) | g 1208427.g 21361657.g 0  | 56780.5  | 100.00% | 8 | 10 | 11 | 0.26% | 22.80% | FVMEFSESR            | K | D | 95.00% | 61.9 | 42.3 | 3.1    | 0 | 2 | 0 | 0 | 2       | 1172.54 | 336  | 344  |
| 40 | H9 | control | S_40 RAW (F025189) | ER-60 protease (Protein disulfide isomerase family A, member) | g 1208427.g 21361657.g 0  |          |         |   |    |    |       |        |                      |   |   |        |      |      |        |   |   |   |   |         |         |      |      |





Supplemental Table 3: gp120 Quantitation data (Raw data from progenesis)

| Ref. Spot | hiv h9 pngase (762 matches) | hiv h9 wt (810 matches) | hiv t1 png (936 matches) | hiv t1 wt (1433 matches) | siv 239 png (602 matches) | siv 239 wt (892 matches) | siv mne png (843 matches) | siv mne wt (823 matches) |
|-----------|-----------------------------|-------------------------|--------------------------|--------------------------|---------------------------|--------------------------|---------------------------|--------------------------|
| 1790      | 0.05                        | 0.941                   | 0.046                    | 0.15                     | 0.028                     | 0.835                    | 0.055                     | 4.119                    |
| 1802      | 0.87                        | 0.064                   | 0.892                    | 0.345                    | 1.09                      | 0.85                     | 0.548                     | 0.507                    |
| 1806      | 0.13                        | 0.196                   | 0.027                    | 0.019                    | 0.02                      | 0.041                    | 1.207                     | 0.006                    |

PRESENTED IN PAPER

| PRESENTED IN PAPER |      | RATIOS (GRAPHS)                               |                                         |                                               |                                         | COMPARISONS (RATIOS)                              |
|--------------------|------|-----------------------------------------------|-----------------------------------------|-----------------------------------------------|-----------------------------------------|---------------------------------------------------|
| REGION             | SPOT | DEGLYCOSYLATED<br>hiv h9 pngase (762 matches) | GLYCOSYLATED<br>hiv h9 wt (810 matches) | DEGLYCOSYLATED<br>hiv h9 pngase (762 matches) | GLYCOSYLATED<br>hiv h9 wt (810 matches) | COMPARISONS (RATIOS)                              |
| REGION A           | SPOT | 1790                                          | 0.05                                    | 0.941                                         | 5.045408678                             | SIV MNE TO HIV H9 (GLYCOSYLATED)<br>4.377258236   |
|                    |      | 1790                                          | 0.055                                   | 4.119                                         | 1.317680882                             | 98.68231912                                       |
|                    |      |                                               |                                         |                                               |                                         |                                                   |
| REGION B           | SPOT | 1802                                          | 0.87                                    | 0.064                                         | 93.14775161                             | SIV MNE TO HIV H9 (DEGLYCOSYLATED)<br>1.387356322 |
|                    |      | 1802                                          | 0.548                                   | 0.507                                         | 51.94312796                             | 48.05687204                                       |
|                    |      |                                               |                                         |                                               |                                         |                                                   |
| REGION C           | SPOT | 1806                                          | 0.13                                    | 0.196                                         | 39.87730061                             | HIV H9 TO HIV T1 (GLYCOSYLATED)<br>6.273333333    |
|                    |      | 1806                                          | 1.207                                   | 0.006                                         | 99.50535862                             | 0.494641385                                       |
|                    |      |                                               |                                         |                                               |                                         |                                                   |

EXCLUDED FROM PAPER

|          |      |      |       |       |             |                                                          |
|----------|------|------|-------|-------|-------------|----------------------------------------------------------|
| REGION A | SPOT | 1790 | 0.046 | 0.15  | 23.46938776 | HIV T1 TO SIV 239 (GLYCOSYLATED)<br>5.566666667          |
|          |      | 1790 | 0.028 | 0.835 | 3.244495944 | 96.75550406                                              |
|          |      |      |       |       |             | SIV MNE TO SIV 239 (GLYCOSYLATED)<br>4.932934132         |
| REGION B | SPOT | 1802 | 0.892 | 0.345 | 72.10994341 | SIV MNE TO SIV 239 (DEGLYCOSYLATED)<br>NO MATCHING SPOTS |
|          |      | 1802 | 1.09  | 0.85  | 56.18556701 | 43.81443299                                              |
|          |      |      |       |       |             |                                                          |
| REGION C | SPOT | 1806 | 0.027 | 0.019 | 58.69565217 |                                                          |
|          |      | 1806 | 0.02  | 0.041 | 32.78688525 | 67.21311475                                              |
|          |      |      |       |       |             |                                                          |

**SUPPLEMENTAL TABLE 4: Viral Peptides - Orbirap**

| M/SMS sample | Protein name                            | Protein accession | Protein molecular weight (Da) | Protein identification probability | Number of unique peptides | Number of unique spectra | Number of total spectra | Percentage of total spectra | Percentage sequence coverage | Assigned | Spectrum name            | Peptide sequence | Previous amino acid | Next amino acid | Peptide identification probability                                              | Variable modifications identified by spectrum | Observed m/z | Actual peptide mass | Calculated Peptide Mass | Spectrum charge | Actual minus calculated | Actual minus calculated | Peptide start index | Peptide stop index |
|--------------|-----------------------------------------|-------------------|-------------------------------|------------------------------------|---------------------------|--------------------------|-------------------------|-----------------------------|------------------------------|----------|--------------------------|------------------|---------------------|-----------------|---------------------------------------------------------------------------------|-----------------------------------------------|--------------|---------------------|-------------------------|-----------------|-------------------------|-------------------------|---------------------|--------------------|
| ID_H9        | Envelope glycoprotein (Fragment)        | Q8Q9Q2_SHV1       | 24781.5                       | 76.30%                             | 1                         | 1                        | 1                       | 0.02%                       | 3.15%                        | TRUE     | pppHH9H_0163.0163.2.0a   | DKHSSTK          | A                   |                 | 95.00% Q1: Deamidation (+0.98), T6: Phospho (+79.97)                            | 422.7687                                      | 843.2578     | 843.2578            | 2                       | -0.1543         | -0.1543                 | 130                     | 136                 |                    |
| ID_H9        | Envelope glycoprotein (Fragment)        | Q8Q9Q3_SHV1       | 22759.3                       | 76.30%                             | 1                         | 1                        | 1                       | 0.02%                       | 4.21%                        | TRUE     | pppHH9H_0234.0234.3.0a   | LRKQFGFK         | T                   |                 | 95.00% Q4: Deamidation (+0.98), N8: Deamidation (+0.98)                         | 383.88                                        | 1146.617     | 1146.6018           | 3                       | -0.0226         | 19.64                   | 86                      | 86                  |                    |
| ID_H9        | Envelope glycoprotein (Fragment)        | Q8Q9Q4_SHV1       | 98209.5                       | 76.30%                             | 1                         | 1                        | 1                       | 0.02%                       | 1.05%                        | TRUE     | pppHH9H_0286.0286.3.0a   | TLVEQAR          | T                   |                 | 95.00% Q5: Deamidation (+0.98), N8: Deamidation (+0.98)                         | 383.1892                                      | 1146.544     | 1147.5749           | 3                       | -0.023055       | -20.11                  | 335                     | 343                 |                    |
| ID_H9        | Envelope glycoprotein (Fragment)        | Q8Q9Q5_SHV1       | 22292.4                       | 76.30%                             | 1                         | 2                        | 6                       | 0.10%                       | 5.42%                        | TRUE     | pppHH9H_0562.0562.3.0a   | QVTKLRACK        | N                   |                 | 95.00% Q1: Deamidation (+0.98)                                                  | 444.8997                                      | 1331.676     | 1332.8004           | 3                       | -0.1169         | -87.75                  | 81                      | 91                  |                    |
| ID_H9        | Envelope glycoprotein (Fragment)        | Q8Q9Q6_SHV1       | 22292.4                       | 76.30%                             | 1                         | 2                        | 6                       | 0.10%                       | 5.42%                        | TRUE     | pppHH9H_0573.0573.2.0a   | QVTKLRACK        | N                   |                 | 95.00% Q1: Deamidation (+0.98)                                                  | 666.8477                                      | 1331.676     | 1332.8004           | 3                       | -0.1129         | -84.73                  | 81                      | 91                  |                    |
| ID_H9        | Envelope glycoprotein (Fragment)        | Q8Q9Q7_SHV1       | 22292.4                       | 76.30%                             | 1                         | 2                        | 6                       | 0.10%                       | 5.42%                        | TRUE     | pppHH9H_0576.0576.2.0a   | QVTKLRACK        | N                   |                 | 95.00% Q9: Deamidation (+0.98)                                                  | 666.8484                                      | 1331.677     | 1332.8004           | 3                       | -0.1154         | -86.56                  | 81                      | 91                  |                    |
| ID_H9        | Envelope glycoprotein (Fragment)        | Q8Q9Q8_SHV1       | 22292.4                       | 76.30%                             | 1                         | 2                        | 6                       | 0.10%                       | 5.42%                        | TRUE     | pppHH9H_0638.0638.3.0a   | QVTKLRACK        | N                   |                 | 95.00% Q1: Deamidation (+0.98)                                                  | 444.8997                                      | 1331.676     | 1332.8004           | 3                       | -0.1169         | -87.75                  | 81                      | 91                  |                    |
| ID_H9        | Envelope glycoprotein (Fragment)        | Q8Q9Q9_SHV1       | 22292.4                       | 76.30%                             | 1                         | 2                        | 6                       | 0.10%                       | 5.42%                        | TRUE     | pppHH9H_0656.0656.2.0a   | QVTKLRACK        | N                   |                 | 95.00% Q9: Deamidation (+0.98)                                                  | 666.8467                                      | 1331.676     | 1332.8004           | 3                       | -0.1149         | -85.18                  | 81                      | 91                  |                    |
| ID_H9        | Envelope glycoprotein (Fragment)        | Q8Q9Q0_SHV1       | 22292.4                       | 76.30%                             | 1                         | 2                        | 6                       | 0.10%                       | 5.42%                        | TRUE     | pppHH9H_0660.0660.2.0a   | QVTKLRACK        | N                   |                 | 95.00% Q9: Deamidation (+0.98)                                                  | 666.8476                                      | 1331.676     | 1332.8004           | 3                       | -0.113          | -84.82                  | 81                      | 91                  |                    |
| ID_H9        | Envelope glycoprotein (Fragment)        | Q10701_SHV1       | 12921.9                       | 76.30%                             | 1                         | 1                        | 2                       | 0.03%                       | 7.83%                        | TRUE     | pppHH9H_0681.0681.2.0a   | KVQQQLR          | K                   |                 | 95.00% Q4: Deamidation (+0.98), T8: Phospho (+79.97)                            | 590.8142                                      | 1179.613     | 1180.6456           | 2                       | -0.0205         | -21.2                   | 68                      | 76                  |                    |
| ID_H9        | Envelope glycoprotein (Fragment)        | Q10701_SHV1       | 12921.9                       | 76.30%                             | 1                         | 1                        | 2                       | 0.03%                       | 7.83%                        | TRUE     | pppHH9H_0688.0688.2.0a   | KVQQQLR          | K                   |                 | 95.00% Q4: Deamidation (+0.98), T8: Phospho (+79.97)                            | 590.8144                                      | 1179.613     | 1180.6456           | 2                       | -0.0205         | -21.2                   | 68                      | 76                  |                    |
| ID_H9        | Envelope glycoprotein (Fragment)        | Q8Q9Q2_SHV1       | 11638.2                       | 76.30%                             | 1                         | 1                        | 2                       | 0.03%                       | 12.10%                       | TRUE     | pppHH9H_0719.0719.3.0a   | TLLQVEAHR        | F                   |                 | 94.00% T1: Phospho (+79.97), N11: Deamidation (+0.98)                           | 497.2613                                      | 1488.76      | 1489.7417           | 3                       | -0.02847        | -17.78                  | 72                      | 83                  |                    |
| ID_H9        | Envelope glycoprotein (Fragment)        | Q8Q9Q2_SHV1       | 11638.2                       | 76.30%                             | 1                         | 1                        | 2                       | 0.03%                       | 12.10%                       | TRUE     | pppHH9H_0725.0725.3.0a   | TLLQVEAHR        | F                   |                 | 95.00% T1: Phospho (+79.97), N11: Deamidation (+0.98)                           | 497.2618                                      | 1488.762     | 1489.7417           | 3                       | -0.02906        | -18.85                  | 72                      | 83                  |                    |
| ID_H9        | Envelope glycoprotein (Fragment)        | Q8Q9Q3_SHV1       | 13852.4                       | 76.30%                             | 1                         | 1                        | 1                       | 0.02%                       | 6.03%                        | TRUE     | pppHH9H_0746.0746.2.0a   | ESHSVKK          | T                   |                 | 95.00% N5: Deamidation (+0.98)                                                  | 414.2086                                      | 826.4016     | 827.8263            | 2                       | -0.016949       | -20.43                  | 1                       | 7                   |                    |
| ID_H9        | Envelope glycoprotein (Fragment)        | Q8Q9C1_SHV1       | 98354.6                       | 76.30%                             | 1                         | 1                        | 1                       | 0.02%                       | 1.98%                        | TRUE     | pppHH9H_0772.0772.2.0a   | AEGNSITLK        | K                   |                 | 95.00% N4: Deamidation (+0.98)                                                  | 616.8036                                      | 1231.592     | 1232.5947           | 2                       | 0.006348        | 3.763                   | 417                     | 428                 |                    |
| ID_H9        | Envelope glycoprotein (Fragment)        | Q7SSY1_SHV1       | 52567.3                       | 76.30%                             | 1                         | 1                        | 1                       | 0.02%                       | 1.82%                        | TRUE     | pppHH9H_1156.1156.2.0a   | QVTKLKR          | F                   |                 | 95.00% Q1: Deamidation (+0.98)                                                  | 564.5402                                      | 1127.065     | 1127.7154           | 2                       | 0.3572          | 316.6                   | 311                     | 319                 |                    |
| ID_H9        | Envelope glycoprotein (Fragment)        | Q8J8RS_SHV1       | 17801.9                       | 67.00%                             | 1                         | 1                        | 1                       | 0.02%                       | 4.40%                        | TRUE     | pppHH9H_1272.1272.2.0a   | IRGLVK           | P                   |                 | 92.30% Q4: Deamidation (+0.98)                                                  | 414.3403                                      | 826.6649     | 827.5007            | 2                       | 0.112           | 135.3                   | 1                       | 7                   |                    |
| ID_H9        | Envelope glycoprotein (Fragment)        | Q8ZHF5_SHV1       | 7530.9                        | 76.30%                             | 1                         | 1                        | 1                       | 0.02%                       | 6.86%                        | TRUE     | pppHH9H_1277.1277.2.0a   | LEEQYMK          | K                   |                 | 95.00% Q4: Deamidation (+0.98), N7: Deamidation (+0.98)                         | 527.3062                                      | 1052.705     | 1053.5106           | 2                       | 0.202           | 191.7                   | 101                     | 108                 |                    |
| ID_H9        | Envelope glycoprotein (Fragment)        | Q8ZL09_SHV1       | 97281.5                       | 99.10%                             | 1                         | 1                        | 2                       | 0.03%                       | 0.82%                        | TRUE     | pppHH9H_1306.1306.2.0a   | AHWVPR           | R                   |                 | 95.00% N4: Deamidation (+0.98)                                                  | 404.2023                                      | 806.389      | 807.4477            | 2                       | -0.05068        | -63.05                  | 842                     | 848                 |                    |
| ID_H9        | Envelope glycoprotein (Fragment)        | Q8ZL09_SHV1       | 97281.5                       | 99.10%                             | 1                         | 1                        | 2                       | 0.03%                       | 0.82%                        | TRUE     | pppHH9H_1312.1312.2.0a   | AHWVPR           | R                   |                 | 95.00% N4: Deamidation (+0.98)                                                  | 404.2025                                      | 806.391      | 807.4477            | 2                       | -0.04855        | -60.1                   | 842                     | 848                 |                    |
| ID_H9        | Envelope glycoprotein (Env protein)     | Q8Q7G2_SHV1       | 100595.4                      | 76.30%                             | 1                         | 1                        | 2                       | 0.03%                       | 0.79%                        | TRUE     | pppHH9H_1430.1430.2.0a   | GWNVPR           | R                   |                 | 95.00% N4: Deamidation (+0.98)                                                  | 421.7588                                      | 841.502      | 842.4524            | 2                       | 0.05737         | 66.1                    | 873                     | 879                 |                    |
| ID_H9        | Envelope glycoprotein (Env protein)     | Q8Q7G2_SHV1       | 100595.4                      | 76.30%                             | 1                         | 1                        | 2                       | 0.03%                       | 0.79%                        | TRUE     | pppHH9H_1436.1436.2.0a   | GWNVPR           | R                   |                 | 95.00% N4: Deamidation (+0.98)                                                  | 421.7587                                      | 841.5017     | 842.4524            | 2                       | 0.057055        | 67.74                   | 873                     | 879                 |                    |
| ID_H9        | Envelope protein (Fragment)             | Q77028_SHV1       | 10476.4                       | 74.30%                             | 1                         | 1                        | 1                       | 0.02%                       | 14.70%                       | TRUE     | pppHH9H_1551.1551.3.0a   | IVRSNLT          | T                   |                 | 94.50% N7: Deamidation (+0.98)                                                  | 499.2756                                      | 1494.803     | 1495.8232           | 3                       | -0.012067       | -8.079                  | 1                       | 13                  |                    |
| ID_H9        | Envelope protein (v1 region) (Fragment) | Q77443_SHV1       | 1744.6                        | 76.30%                             | 1                         | 1                        | 1                       | 0.02%                       | 7.62%                        | TRUE     | pppHH9H_1765.1765.2.0a   | QVDSLR           | K                   |                 | 95.00% Q1: Deamidation (+0.98), S3: Phospho (+79.97), Q5: Deamidation (+0.98)   | 501.748                                       | 1013.474     | 1014.4396           | 2                       | -0.02116        | -81.7                   | 80                      | 87                  |                    |
| ID_H9        | Envelope glycoprotein (Fragment)        | Q8P031_SHV1       | 22638.8                       | 76.30%                             | 1                         | 1                        | 1                       | 0.02%                       | 4.46%                        | TRUE     | pppHH9H_1864.1864.2.0a   | LGQGFQMK         | K                   |                 | 95.00% Q4: Deamidation (+0.98), M7: Oxidation (+16.00), N8: Deamidation (+0.98) | 485.2556                                      | 988.4957     | 989.4353            | 2                       | 0.068156        | 70.32                   | 82                      | 90                  |                    |
| ID_H9        | Envelope glycoprotein (Fragment)        | Q8J5U7_SHV1       | 15081.3                       | 76.30%                             | 1                         | 1                        | 1                       | 0.02%                       | 14.00%                       | TRUE     | pppHH9H_1915.1915.2.0a   | STNTDNTK         | E                   |                 | 95.00% N2: Deamidation (+0.98), N6: Deamidation (+0.98), S16: Phospho (+79.97)  | 1041.5092                                     | 2081.003     | 2081.8154           | 2                       | 0.1951          | 93.69                   | 25                      | 43                  |                    |
| ID_H9        | Envelope glycoprotein (Fragment)        | Q8P084_SHV1       | 16340.8                       | 76.30%                             | 1                         | 1                        | 1                       | 0.02%                       | 8.22%                        | TRUE     | pppHH9H_1974.1974.2.0a   | KLSTFHTK         | F                   |                 | 95.00% T3: Phospho (+79.97), N6: Deamidation (+0.98)                            | 778.9079                                      | 1951.8       | 1952.8143           | 2                       | -0.006959       | -4.481                  | 59                      | 70                  |                    |
| ID_H9        | Envelope glycoprotein (Fragment)        | Q81290_SHV1       | 8669.4                        | 76.30%                             | 1                         | 1                        | 1                       | 0.02%                       | 22.20%                       | TRUE     | pppHH9H_2558.2558.3.0a   | LNSVIVRK         | I                   |                 | 95.00% N2: Deamidation (+0.98), N3: Deamidation (+0.98), T10: Phospho (+79.97)  | 694.6727                                      | 2080.995     | 2081.9802           | 3                       | 0.02225         | 10.67                   | 22                      | 39                  |                    |
| ID_H9        | Envelope glycoprotein (Fragment)        | Q8J8A8_SHV1       | 98561.6                       | 76.30%                             | 1                         | 1                        | 1                       | 0.02%                       | 1.61%                        | TRUE     | pppHH9H_2841.2841.3.0a   | WSDTNTK          | S                   |                 | 95.00% Q1: Deamidation (+0.98), N11: Deamidation (+0.98), S13: Phospho (+79.97) | 503.3473                                      | 1508.899     | 1507.559            | 3                       | 0.3474          | 230.4                   | 413                     | 426                 |                    |
| ID_H9        | Envelope glycoprotein (Fragment)        | Q8L0T7_SHV1       | 16540.5                       | 76.30%                             | 1                         | 1                        | 1                       | 0.02%                       | 11.80%                       | TRUE     | pppHH9H_3638.3638.3.0a   | QAHVQGR          | Y                   |                 | 95.00% Q1: Deamidation (+0.98), N12: Deamidation (+0.98)                        | 620.4375                                      | 1658.298     | 1658.9122           | 3                       | 0.3946          | 208.9                   | 49                      | 65                  |                    |
| ID_H9        | Envelope glycoprotein (Fragment)        | Q8Q9D13_SHV1      | 21535.9                       | 76.30%                             | 1                         | 1                        | 1                       | 0.02%                       | 14.00%                       | TRUE     | pppHH9H_3651.3651.3.0a   | VQGMVPR          | D                   |                 | 95.00% Q11: Deamidation (+0.98), M15: Oxidation (+16.00)                        | 978.523                                       | 2932.546     | 2933.5413           | 3                       | 0.012249        | 4.161                   | 154                     | 180                 |                    |
| ID_H9        | Envelope glycoprotein (Fragment)        | Q8Q9N8_SHV1       | 22607                         | 76.30%                             | 1                         | 1                        | 1                       | 0.02%                       | 5.45%                        | TRUE     | pppHH9H_4496.4496.3.0a   | KLGEQGR          | I                   |                 | 95.00% Q5: Deamidation (+0.98), N9: Deamidation (+0.98)                         | 437.3271                                      | 1308.958     | 1309.6577           | 3                       | 0.3081          | 235.2                   | 81                      | 91                  |                    |
| ID_H9        | Envelope glycoprotein (Fragment)        | Q72618_SHV1       | 12471.3                       | 76.30%                             | 1                         | 1                        | 1                       | 0.02%                       | 9.17%                        | TRUE     | pppHH9H_4738.4738.3.0a   | LLNLSLAE         | I                   |                 | 95.00% N4: Deamidation (+0.98), S8: Phospho (+79.97)                            | 423.3355                                      | 926.974      | 927.8169            | 3                       | 0.3826          | 286.2                   | 1                       | 11                  |                    |
| ID_H9        | Envelope glycoprotein (Fragment)        | Q8L184_SHV1       | 43100                         | 76.30%                             | 1                         | 1                        | 1                       | 0.02%                       | 3.87%                        | TRUE     | pppHH9H_5092.5092.2.0a   | LDVPIGNSR        | Y                   |                 | 95.00% Q4: Deamidation (+0.98), S10: Phospho (+79.97)                           | 522.5549                                      | 1564.041     | 1564.7628           | 3                       | 0.2864          | 183                     | 63                      | 77                  |                    |
| ID_H9        | Envelope glycoprotein (Fragment)        | Q81023_SHV1       | 23953.1                       | 61.40%                             | 1                         | 1                        | 1                       | 0.02%                       | 3.65%                        | TRUE     | pppHH9H_5378.5378.2.0a   | DDDSNTRK         | S                   |                 | 90.40% S4: Phospho (+79.97), N5: Deamidation (+16.00), N8: Deamidation (+0.98)  | 496.6944                                      | 989.1932     | 990.2941            | 2                       | -0.099152       | -84.96                  | 15                      | 22                  |                    |
| ID_MNE       | Envelope glycoprotein (Fragment)        | Q8D923_SHV1       | 9745.2                        | 70.10%                             | 1                         | 1                        | 1                       | 0.02%                       | 11.40%                       | TRUE     | pppMNEH_046.046.3.0a     | LDDSPK           | K                   |                 | 93.30% Q2: Deamidation (+0.98)                                                  | 378.1614                                      | 1125.661     | 1126.5383           | 3                       | -0.0697         | -81.89                  | 79                      | 88                  |                    |
| ID_MNE       | Env glycoprotein (Fragment)             | Q8H1T4_SHV1       | 18333.2                       | 76.30%                             | 1                         | 1                        | 1                       | 0.02%                       | 5.88%                        | TRUE     | pppMNEH_0492.0492.3.0a   | LAQVMRR          | R                   |                 | 95.00% Q4: Deamidation (+0.98), M6: Oxidation (+16.00), S9: Phospho (+79.97)    | 424.5749                                      | 1270.701     | 1271.6071           | 3                       | 0.102           | 80.25                   | 3                       | 12                  |                    |
| ID_MNE       | Envelope glycoprotein (Fragment)        | Q8D973_SHV1       | 11205.9                       | 76.30%                             | 1                         | 1                        | 1                       | 0.02%                       | 10.90%                       | TRUE     | pppMNEH_0709.0709.3.0a   | WNETLQHK         | L                   |                 | 95.00% T4: Phospho (+79.97), Q6: Deamidation (+0.98)                            | 492.2446                                      | 1383.71      | 1384.6515           | 3                       | 0.06677         | 48.22                   | 66                      | 76                  |                    |
| ID_MNE       | Envelope glycoprotein (Env protein)     | Q8Q7G2_SHV1       | 100595.4                      | 76.30%                             | 1                         | 3                        | 3                       | 0.06%                       | 0.79%                        | TRUE     | pppMNEH_1022.1022.2.0a   | GWNVPR           | R                   |                 | 95.00% N4: Deamidation (+0.98)                                                  | 421.7591                                      | 841.5026     | 842.4524            | 2                       | 0.05765         | 68.75                   | 873                     | 879                 |                    |
| ID_MNE       | Envelope glycoprotein (Env protein)     | Q8Q7G2_SHV1       | 100595.4                      | 76.30%                             | 1                         | 3                        | 3                       | 0.06%                       | 0.79%                        | TRUE     | pppMNEH_1057.1057.2.0a   | GWNVPR           | R                   |                 | 95.00% N4: Deamidation (+0.98)                                                  | 421.7591                                      | 841.5025     | 842.4524            | 2                       | 0.057854        | 68.68                   | 873                     | 879                 |                    |
| ID_MNE       | Envelope glycoprotein (Env protein)     | Q8Q7G2_SHV1       | 100595.4                      | 76.30%                             | 1                         | 3                        | 3                       | 0.06%                       | 0.79%                        | TRUE     | pppMNEH_1058.1058.2.0a   | GWNVPR           | R                   |                 | 95.00% N4: Deamidation (+0.98)                                                  | 421.7591                                      | 841.5025     | 842.4524            | 2                       | 0.057854        | 68.68                   | 873                     | 879                 |                    |
| ID_MNE       | Envelope glycoprotein (Fragment)        | Q8H8C1_SHV1       | 24554.8                       | 76.30%                             | 1                         | 1                        | 1                       | 0.02%                       | 5.46%                        | TRUE     | pppMNEH_1080.1080.2.0a   | ALCEVQK          | F                   |                 | 95.00% Q3: Deamidation (+0.98), S6: Phospho (+79.97), Q8: Deamidation (+0.98)   | 681.5288                                      | 1380.642     | 1381.673            | 2                       | -0.02319        | -16.79                  | 69                      | 80                  |                    |
| ID_MNE       | Envelope glycoprotein (Fragment)        | Q8H8C1_SHV1       | 24554.8                       | 76.30%                             | 1                         | 1                        | 1                       | 0.02%                       | 6.52%                        | TRUE     | pppMNEH_1102.1102.3.0a</ |                  |                     |                 |                                                                                 |                                               |              |                     |                         |                 |                         |                         |                     |                    |
